# Supplementary material for: Experimental and clinical data analysis for identification of COVID-19 resistant ACE2 mutations
Source: Sci Rep. 2023 Feb 9;13:2351. doi: 10.1038/s41598-022-20773-9 (PMC9910265; doi:10.1038/s41598-022-20773-9)
Supplement: Supplementary file 1 — Supplementary Tables. [file 41598_2022_20773_MOESM1_ESM.docx]

**Experimental and clinical data analysis for identification of COVID-19 resistance ACE2 mutations**

Pawan Kumar Raghav1*, Aditya Raghav2, Anjali Lathwal3, Archit Saxena4,Zoya Mann2**,** Manisha Sengar5, Raja Rajalingam1

1Immunogenetics and Transplantation Laboratory, Department of Surgery, University of California San Francisco, San Francisco, California, USA.

2BioExIn, Delhi, India

3Department of Computational Biology, Indraprastha Institute of Information Technology, New Delhi, India

4Amity Institute of Biotechnology, Amity University, Sector-125, Noida, Uttar Pradesh, India

5Department of Zoology, Deshbandhu College, University of Delhi, Delhi, India

***Correspondence:**

Dr. Pawan Kumar Raghav, Immunogenetics and Transplantation Laboratory, Department of Surgery, University of California San Francisco, San Francisco, California, USA; Email: PwnRghv@gmail.com, Pawan.Raghav@ucsf.edu; Ph: +1(415)-476-0795; Fax: +1(415)-476-0379

**Running Title:** Impact of ACE2 mutations in cancer and interaction with SARS-CoV-2

**Supplementary Tables Caption**

Supplementary Table 1. Machine learning prediction of patient samples.

Supplementary Table 2. Machine learning prediction of cell line samples.

Supplementary Table 3. Inference score (inhibition and no-inhibition) calculated by binding of experimental verified ACE2 mutant with SARS-CoV and SARS-CoV-2.

Supplementary Table 4. Inference score (inhibition and no-inhibition) calculated by binding of patient ACE2 mutant with SARS-CoV and SARS-CoV-2.

Supplementary Table 5. Inference score (inhibition and no-inhibition) calculated by binding of cell line ACE2 mutant with SARS-CoV and SARS-CoV-2.

**Supplementary Table 1.**

| **Sample_ID** | **Cancer_Type** | **Mutants** | **Function** | **Score** |
| --- | --- | --- | --- | --- |
| Pt15 | Melanoma | L8F | Abolished Binding with SARS-CoV-2 | 0.991226 |
| TCGA-D3-A2JP-06 | Cutaneous Melanoma | Q18K, G268C, W610L | Abolished Binding with SARS-CoV-2 | 0.984554 |
| ME009 | Cutaneous Melanoma | T20I | Abolished Binding with SARS-CoV-2 | 0.936849 |
| TCGA-ER-A19H-06 | Cutaneous Melanoma | E22D | Abolished Binding with SARS-CoV-2 | 0.988182 |
| 587376 | Colorectal Adenocarcinoma | S47C, P284S | Abolished Binding with SARS-CoV-2 | 0.991966 |
| TCGA-AP-A1DK-01 | Uterine Endometrioid Carcinoma | W48L, N437H | Abolished Binding with SARS-CoV-2 | 0.974973 |
| coadread_dfci_2016_3646 | Colorectal Adenocarcinoma | V59D | Abolished Binding with SARS-CoV-2 | 0.994359 |
| TCGA-EO-A3B0-01 | Uterine Endometrioid Carcinoma | F72C | Abolished Binding with SARS-CoV-2 | 0.934714 |
| YUZINO | Cutaneous Melanoma | S109L | Abolished Binding with SARS-CoV-2 | 0.985472 |
| coadread_dfci_2016_1794, TCGA-FF-A7CW-01 | Colorectal Adenocarcinoma, Diffuse Large B-Cell Lymphoma, NOS | R115Q | Abolished Binding with SARS-CoV-2 | 0.975123 |
| TCGA-ZF-A9RG-01 | Bladder Urothelial Carcinoma | L116F | Abolished Binding with SARS-CoV-2 | 0.98375 |
| TCGA-B5-A1MR-01 | Uterine Endometrioid Carcinoma | L120I, V658L | Abolished Binding with SARS-CoV-2 | 0.986798 |
| TCGA-B5-A11E-01 | Uterine Endometrioid Carcinoma | S128I, R169I, S602Y | Abolished Binding with SARS-CoV-2 | 0.929986 |
| TCGA-AX-A1CE-01, TCGA-D8-A1JG-01 | Uterine Endometrioid Carcinoma, Breast Invasive Ductal Carcinoma | L162F | Abolished Binding with SARS-CoV-2 | 0.962729 |
| TCGA-AG-A002-01 | Rectal Adenocarcinoma | R169I, H195Y, N394H | Abolished Binding with SARS-CoV-2 | 0.987164 |
| TCGA-NA-A5I1-01 | Uterine Carcinosarcoma/Uterine Malignant Mixed Mullerian Tumor | E182D | Abolished Binding with SARS-CoV-2 | 0.974798 |
| TCGA-AP-A056-01 | Uterine Endometrioid Carcinoma | N194K, R306I, E479D | Abolished Binding with SARS-CoV-2 | 0.97028 |
| TCGA-VQ-A8E7-01 | Tubular Stomach Adenocarcinoma | Y202H | Abolished Binding with SARS-CoV-2 | 0.992465 |
| TCGA-AP-A059-01 | Uterine Endometrioid Carcinoma | R204I | Abolished Binding with SARS-CoV-2 | 0.941506 |
| coadread_dfci_2016_1254 | Colorectal Adenocarcinoma | V212I | Abolished Binding with SARS-CoV-2 | 0.990377 |
| TCGA-BR-4292-01 | Stomach Adenocarcinoma | R219H | Abolished Binding with SARS-CoV-2 | 0.991068 |
| TCGA-44-2659-01 | Lung Adenocarcinoma | R219P | Abolished Binding with SARS-CoV-2 | 0.980017 |
| TCGA-D3-A2JB-06 | Cutaneous Melanoma | G272C | Abolished Binding with SARS-CoV-2 | 0.996261 |
| TCGA-D1-A103-01 | Uterine Endometrioid Carcinoma | R273K | Abolished Binding with SARS-CoV-2 | 0.968842 |
| TCGA-2J-AABP-01 | Pancreatic Adenocarcinoma | V293I | Abolished Binding with SARS-CoV-2 | 0.992788 |
| coadread_dfci_2016_116 | Colorectal Adenocarcinoma | W302G, F400L | Abolished Binding with SARS-CoV-2 | 0.999375 |
| H104362 | Hepatocellular Adenoma | Q305L | Abolished Binding with SARS-CoV-2 | 0.94587 |
| TCGA-69-7980-01 | Lung Adenocarcinoma | L320F | Abolished Binding with SARS-CoV-2 | 0.990631 |
| TCGA-AA-A01P-01 | Colon Adenocarcinoma | T324S | Abolished Binding with SARS-CoV-2 | 0.975799 |
| TCGA-CU-A0YR-01 | Bladder Urothelial Carcinoma | Q325P | Abolished Binding with SARS-CoV-2 | 0.961386 |
| TCGA-D7-6528-01 | Tubular Stomach Adenocarcinoma | N330H | Abolished Binding with SARS-CoV-2 | 0.927919 |
| MO_1288 | Breast Invasive Ductal Carcinoma | T334R | Abolished Binding with SARS-CoV-2 | 0.943646 |
| MEL-IPI_Pat74-Tumor-SM-4DK2Z, Pat74, TCGA-AA-3977-01 | Cutaneous Melanoma, Cutaneous Melanoma, Colon Adenocarcinoma | G337E | Abolished Binding with SARS-CoV-2 | 0.980061 |
| TCGA-VQ-A8P2-01 | Mucinous Stomach Adenocarcinoma | N338D | Abolished Binding with SARS-CoV-2 | 0.977047 |
| TCGA-06-1801-01 | Glioblastoma Multiforme | I358F | Abolished Binding with SARS-CoV-2 | 0.990221 |
| TCGA-AA-3947-01 | Mucinous Adenocarcinoma of the Colon and Rectum | V364A | Abolished Binding with SARS-CoV-2 | 0.973899 |
| TCGA-D1-A17Q-01 | Uterine Endometrioid Carcinoma | E375D, K577N, R768W | Abolished Binding with SARS-CoV-2 | 0.959294 |
| Au8 | Desmoplastic Melanoma | R393G | Abolished Binding with SARS-CoV-2 | 0.932193 |
| TCGA-EO-A22U-01 | Uterine Endometrioid Carcinoma | R393I, E571G, R768W | Abolished Binding with SARS-CoV-2 | 0.990244 |
| MO_1433 | Lung Adenocarcinoma | M462I | Abolished Binding with SARS-CoV-2 | 0.984195 |
| TCGA-92-7341-01 | Lung Squamous Cell Carcinoma | W477R | Abolished Binding with SARS-CoV-2 | 0.994822 |
| MEL-IPI_Pat62-Tumor-SM-4DK2N, Pat62 | Cutaneous Melanoma, Cutaneous Melanoma | V488M | Abolished Binding with SARS-CoV-2 | 0.935494 |
| TCGA-22-1016-01 | Lung Squamous Cell Carcinoma | V491L | Abolished Binding with SARS-CoV-2 | 0.984506 |
| TCGA-ZJ-AB0H-01 | Cervical Squamous Cell Carcinoma | T496A | Abolished Binding with SARS-CoV-2 | 0.98185 |
| TCGA-A5-A1OF-01 | Uterine Mixed Endometrial Carcinoma | R518M | Abolished Binding with SARS-CoV-2 | 0.986573 |
| 5-PT027-T1 | Skin Cancer, Non-Melanoma | P565L | Abolished Binding with SARS-CoV-2 | 0.99702 |
| TCGA-06-6389-01 | Glioblastoma Multiforme | V581I | Abolished Binding with SARS-CoV-2 | 0.958911 |
| Pat_41_Post | Melanoma | T593I, P729S | Abolished Binding with SARS-CoV-2 | 0.955143 |
| FR9547 | Lung Adenocarcinoma | N599K | Abolished Binding with SARS-CoV-2 | 0.997691 |
| DFCI-CLL139-Tumor | Chronic Lymphocytic Leukemia/Small Lymphocytic Lymphoma | N601I | Abolished Binding with SARS-CoV-2 | 0.995052 |
| TCGA-AU-6004-01 | Colon Adenocarcinoma | Y613H | Abolished Binding with SARS-CoV-2 | 0.995978 |
| TCGA-AA-A010-01 | Colon Adenocarcinoma | L628F | Abolished Binding with SARS-CoV-2 | 0.973477 |
| TCGA-BR-4201-01 | Stomach Adenocarcinoma | R644Q | Abolished Binding with SARS-CoV-2 | 0.988984 |
| TCGA-55-8506-01 | Lung Adenocarcinoma | V670L | Abolished Binding with SARS-CoV-2 | 0.985455 |
| MSKCC-0411_R | Bladder Urothelial Carcinoma | V672A | Abolished Binding with SARS-CoV-2 | 0.988464 |
| CRUK0027-R2 | Non-Small Cell Lung Cancer | K676E | Abolished Binding with SARS-CoV-2 | 0.953539 |
| TCGA-L5-A8NQ-01 | Esophageal Squamous Cell Carcinoma | S692F | Abolished Binding with SARS-CoV-2 | 0.956312 |
| coadread_dfci_2016_102, TCGA-RD-A8NB-01 | Colorectal Adenocarcinoma, Diffuse Type Stomach Adenocarcinoma | R708Q | Abolished Binding with SARS-CoV-2 | 0.976865 |
| coadread_dfci_2016_3064 | Colorectal Adenocarcinoma | R716H | Abolished Binding with SARS-CoV-2 | 0.902039 |
| CHC2128T | Hepatocellular Carcinoma | P737H | Abolished Binding with SARS-CoV-2 | 0.972928 |
| CSCC-31-T | Cutaneous Squamous Cell Carcinoma | P737L | Abolished Binding with SARS-CoV-2 | 0.971393 |
| NCH-CA-3 | Colorectal Adenocarcinoma | V748F | Abolished Binding with SARS-CoV-2 | 0.991371 |
| TCGA-19-1390-01 | Glioblastoma Multiforme | R766K | Abolished Binding with SARS-CoV-2 | 0.950272 |
| TCGA-BS-A0UJ-01 | Uterine Endometrioid Carcinoma | R775I | Abolished Binding with SARS-CoV-2 | 0.932951 |
| TCGA-55-8205-01 | Lung Adenocarcinoma | T798P | Abolished Binding with SARS-CoV-2 | 0.967652 |
| TCGA-VS-A958-01 | Cervical Squamous Cell Carcinoma | T803I | Abolished Binding with SARS-CoV-2 | 0.949053 |
| Pt1 | Melanoma | G789R | Abolished Binding with SARS-CoV-2 | 0.975632 |
| SC_9081-TM, YURED | Prostate Adenocarcinoma, Cutaneous Melanoma | D785N | Abolished Binding with SARS-CoV-2 | 0.985862 |
| TCGA-ER-A1A1-06 | Cutaneous Melanoma | P780S | Abolished Binding with SARS-CoV-2 | 0.987448 |
| 5-PT001-T1 | Skin Cancer, Non-Melanoma | G764R | Abolished Binding with SARS-CoV-2 | 0.976896 |
| TCGA-4A-A93Y-01 | Papillary Renal Cell Carcinoma | F762L | Abolished Binding with SARS-CoV-2 | 0.972786 |
| AMPAC_719 | Ampullary Carcinoma | I761T | Abolished Binding with SARS-CoV-2 | 0.956141 |
| TCGA-AJ-A3BH-01 | Uterine Endometrioid Carcinoma | L760M | Abolished Binding with SARS-CoV-2 | 0.977042 |
| OS-47-SJ | Osteosarcoma | N720S | Abolished Binding with SARS-CoV-2 | 0.970458 |
| DLBCL-RICOVER_1150 | Activated B-cell Type | D713N | Abolished Binding with SARS-CoV-2 | 0.991445 |
| 5-VS045-T1 | Skin Cancer, Non-Melanoma | E701K | Abolished Binding with SARS-CoV-2 | 0.986143 |
| TCGA-CR-6484-01 | Head and Neck Squamous Cell Carcinoma | I694M | Abolished Binding with SARS-CoV-2 | 0.985302 |
| TCGA-73-4658-01 | Lung Adenocarcinoma | D693N | Abolished Binding with SARS-CoV-2 | 0.989882 |
| TCGA-AG-3892-01, TCGA-F5-6814-01 | Rectal Adenocarcinoma, Rectal Adenocarcinoma | F683L | Abolished Binding with SARS-CoV-2 | 0.988775 |
| MO_1146 | Cutaneous Melanoma | E667K | Abolished Binding with SARS-CoV-2 | 0.964255 |
| TCGA-AA-A00N-01 | Mucinous Adenocarcinoma of the Colon and Rectum | K625T | Abolished Binding with SARS-CoV-2 | 0.980346 |
| TCGA-EK-A2RN-01 | Cervical Squamous Cell Carcinoma | I618M | Abolished Binding with SARS-CoV-2 | 0.956152 |
| TCGA-AA-3984-01 | Colon Adenocarcinoma | D609N | Abolished Binding with SARS-CoV-2 | 0.981786 |
| TCGA-A5-A2K5-01 | Uterine Endometrioid Carcinoma | K600N | Abolished Binding with SARS-CoV-2 | 0.981019 |
| TCGA-ND-A4WC-01 | Uterine Carcinosarcoma/Uterine Malignant Mixed Mullerian Tumor | D597E | Abolished Binding with SARS-CoV-2 | 0.983115 |
| TCGA-EO-A22R-01 | Uterine Endometrioid Carcinoma | N578S, Y497C | Abolished Binding with SARS-CoV-2 | 0.986893 |
| TCGA-A5-A0G2-01 | Uterine Serous Carcinoma/Uterine Papillary Serous Carcinoma | K577N | Abolished Binding with SARS-CoV-2 | 0.935375 |
| 5-NB008-T1 | Skin Cancer, Non-Melanoma | G561R | Abolished Binding with SARS-CoV-2 | 0.996792 |
| TCGA-Z2-A8RT-06 | Cutaneous Melanoma | E489K | Abolished Binding with SARS-CoV-2 | 0.934526 |
| coadread_dfci_2016_3498 | Colorectal Adenocarcinoma | I468T | Abolished Binding with SARS-CoV-2 | 0.975164 |
| TCGA-D7-6527-01 | Papillary Stomach Adenocarcinoma | K458T | Abolished Binding with SARS-CoV-2 | 0.913502 |
| TCGA-24-1564-01 | Serous Ovarian Cancer | L450P | Abolished Binding with SARS-CoV-2 | 0.990695 |
| 19424739 | Renal Non-Clear Cell Carcinoma | D431G | Abolished Binding with SARS-CoV-2 | 0.993077 |
| TCGA-FI-A2D5-01 | Uterine Endometrioid Carcinoma | D427N, A576T | Abolished Binding with SARS-CoV-2 | 0.990195 |
| LSD4744, LSD4744_T | Cutaneous Melanoma | P426S | Abolished Binding with SARS-CoV-2 | 0.993034 |
| TCGA-BS-A0UF-01 | Uterine Endometrioid Carcinoma | K419T | Abolished Binding with SARS-CoV-2 | 0.978181 |
| TCGA-BR-7707-01 | Stomach Adenocarcinoma | A412T | Abolished Binding with SARS-CoV-2 | 0.99253 |
| MEL-JWCI-WGS-12 | Cutaneous Melanoma | E406K | Abolished Binding with SARS-CoV-2 | 0.977935 |
| H072511 | Hepatocellular Adenoma | G405W | Abolished Binding with SARS-CoV-2 | 0.998385 |
| CRUK0001-R1, CRUK0001-R2, CRUK0001-R3 | Non-Small Cell Lung Cancer | A403V | Abolished Binding with SARS-CoV-2 | 0.974066 |
| YULAN | Cutaneous Melanoma | G399R | Abolished Binding with SARS-CoV-2 | 0.998998 |
| 585208 | Small Cell Lung Cancer | E398K | Abolished Binding with SARS-CoV-2 | 0.985693 |
| TCGA-56-7731-01 | Lung Squamous Cell Carcinoma | G395V | Abolished Binding with SARS-CoV-2 | 0.962336 |
| Pat_22_Post, Pat_22_Pre | Melanoma | D368N | Abolished Binding with SARS-CoV-2 | 0.982274 |
| WA48 | Prostate Adenocarcinoma | D367V | Abolished Binding with SARS-CoV-2 | 0.997077 |
| LUAD-LIP77 | Lung Adenocarcinoma | R357S | Abolished Binding with SARS-CoV-2 | 0.997425 |
| MEL-IPI_Pat11-Tumor-SM-4DK17, Pat11 | Melanoma of Unknown Primary, Cutaneous Melanoma | D355N | Abolished Binding with SARS-CoV-2 | 0.989712 |
| coadread_dfci_2016_341 | Colorectal Adenocarcinoma | G352W | Abolished Binding with SARS-CoV-2 | 0.999066 |
| TCGA-B5-A11H-01 | Uterine Endometrioid Carcinoma | P336S, K26N | Abolished Binding with SARS-CoV-2 | 0.980714 |
| TCGA-D3-A8GI-06 | Cutaneous Melanoma | A311V | Abolished Binding with SARS-CoV-2 | 0.96886 |
| TCGA-BA-A6DA-01 | Head and Neck Squamous Cell Carcinoma | A296T | Abolished Binding with SARS-CoV-2 | 0.996991 |
| 5-VS009-T2 | Skin Cancer, Non-Melanoma | D269N | Abolished Binding with SARS-CoV-2 | 0.976455 |
| TCGA-A5-A0G1-01 | Uterine Serous Carcinoma/Uterine Papillary Serous Carcinoma | D269Y | Abolished Binding with SARS-CoV-2 | 0.972665 |
| MO_1111 | Lung Adenocarcinoma | A264S | Abolished Binding with SARS-CoV-2 | 0.976742 |
| TCGA-95-7948-01, TCGA-HC-A76W-01 | Lung Adenocarcinoma, Prostate Adenocarcinoma | I256M | Abolished Binding with SARS-CoV-2 | 0.981222 |
| CLL-GCLL-0034-Tumor-SM-41JMX | Chronic Lymphocytic Leukemia/Small Lymphocytic Lymphoma | A242T | Abolished Binding with SARS-CoV-2 | 0.982475 |
| HN_62652 | Head and Neck Squamous Cell Carcinoma | E232K | Abolished Binding with SARS-CoV-2 | 0.978588 |
| coadread_dfci_2016_197 | Colorectal Adenocarcinoma | D213G | Abolished Binding with SARS-CoV-2 | 0.973129 |
| coadread_dfci_2016_3094 | Colorectal Adenocarcinoma | D206Y | Abolished Binding with SARS-CoV-2 | 0.986342 |
| PR4046, PR4046_T | Melanoma | G205V | Abolished Binding with SARS-CoV-2 | 0.922765 |
| TCGA-EE-A29N-06 | Cutaneous Melanoma | H195Y | Abolished Binding with SARS-CoV-2 | 0.985609 |
| TCGA-AP-A1E0-01 | Uterine Endometrioid Carcinoma | H195Y, F683L | Abolished Binding with SARS-CoV-2 | 0.985609 |
| Pt26 | Melanoma | E189K | Abolished Binding with SARS-CoV-2 | 0.927546 |
| TCGA-06-5416-01 | Glioblastoma Multiforme | P178S, E182D, D427N | Abolished Binding with SARS-CoV-2 | 0.969452 |
| 5-VS022-T1 | Skin Cancer, Non-Melanoma | E145K, E639K | Abolished Binding with SARS-CoV-2 | 0.990154 |
| TCGA-EE-A3AG-06 | Cutaneous Melanoma | P138S | Abolished Binding with SARS-CoV-2 | 0.957393 |
| TCGA-AX-A0J0-01 | Uterine Endometrioid Carcinoma | K131Q, F683L | Abolished Binding with SARS-CoV-2 | 0.988122 |
| TCGA-EY-A5W2-01 | Uterine Endometrioid Carcinoma | R115W | Abolished Binding with SARS-CoV-2 | 0.961968 |
| TCGA-62-A46R-01 | Lung Adenocarcinoma | A99S | Abolished Binding with SARS-CoV-2 | 0.990204 |
| TCGA-BS-A0UV-01 | Uterine Endometrioid Carcinoma | M82T, F314L, K600N | Abolished Binding with SARS-CoV-2 | 0.996085 |
| TCGA-UF-A719-01 | Head and Neck Squamous Cell Carcinoma | L73S | Abolished Binding with SARS-CoV-2 | 0.989828 |
| TCGA-AP-A0LM-01 | Uterine Endometrioid Carcinoma | L39M | Abolished Binding with SARS-CoV-2 | 0.993337 |
| TCGA-VR-AA7B-01 | Esophageal Squamous Cell Carcinoma | E37K | Abolished Binding with SARS-CoV-2 | 0.970061 |
| TCGA-B5-A3FA-01 | Uterine Endometrioid Carcinoma | E35K | Abolished Binding with SARS-CoV-2 | 0.978442 |
| TCGA-99-7458-01 | Lung Adenocarcinoma | H34N | Abolished Binding with SARS-CoV-2 | 0.984788 |
| coadread_dfci_2016_593 | Colorectal Adenocarcinoma | F28L | Abolished Binding with SARS-CoV-2 | 0.985589 |
| TCGA-DU-6392-01 | Astrocytoma | A25V, A396T, I679N | Abolished Binding with SARS-CoV-2 | 0.971063 |
| TCGA-EE-A2MR-06 | Cutaneous Melanoma | S44L | No Impact on Binding with SARS-CoV-2 | 0.780976 |
| MO_1072 | Penile Squamous Cell Carcinoma | G220C | No Impact on Binding with SARS-CoV-2 | 0.423312 |
| TCGA-FR-A729-06 | Cutaneous Melanoma | S317F | No Impact on Binding with SARS-CoV-2 | 0.856072 |
| TCGA-EE-A20F-06 | Cutaneous Melanoma | M383I | No Impact on Binding with SARS-CoV-2 | 0.845266 |
| TCGA-GN-A26C-01 | Cutaneous Melanoma | S409L | No Impact on Binding with SARS-CoV-2 | 0.87405 |
| CSCC-27-T | Cutaneous Squamous Cell Carcinoma | P426L | No Impact on Binding with SARS-CoV-2 | 0.835433 |
| TCGA-QK-A8Z8-01 | Head and Neck Squamous Cell Carcinoma | W473L | No Impact on Binding with SARS-CoV-2 | 0.899294 |
| TCGA-F1-6874-01 | Intestinal Type Stomach Adenocarcinoma | P590L | No Impact on Binding with SARS-CoV-2 | 0.817709 |
| TCGA-HZ-7922-01 | Pancreatic Adenocarcinoma | R716C | No Impact on Binding with SARS-CoV-2 | 0.697421 |
| LUAD_E00522 | Lung Adenocarcinoma | R768L | No Impact on Binding with SARS-CoV-2 | 0.872146 |
| TCGA-E6-A1LX-01 | Uterine Endometrioid Carcinoma | R768W | No Impact on Binding with SARS-CoV-2 | 0.883992 |
| SJERG016_D_WES | Acute Lymphoid Leukemia | D615Y | No Impact on Binding with SARS-CoV-2 | 0.801286 |
| PCNSL_4 | Diffuse Large B-Cell Lymphoma, NOS | M579T | No Impact on Binding with SARS-CoV-2 | 0.870354 |
| TCGA-AA-A022-01 | Colon Adenocarcinoma | D494G | No Impact on Binding with SARS-CoV-2 | 0.674958 |
| TCGA-AX-A05Z-01 | Uterine Endometrioid Carcinoma | S280Y | No Impact on Binding with SARS-CoV-2 | 0.747612 |
| TCGA-EE-A183-06 | Cutaneous Melanoma | S280Y, Q598H | No Impact on Binding with SARS-CoV-2 | 0.747612 |
| TCGA-44-7670-01 | Lung Adenocarcinoma | G211W | No Impact on Binding with SARS-CoV-2 | 0.061784 |
| TCGA-39-5035-01 | Lung Squamous Cell Carcinoma | G147V | No Impact on Binding with SARS-CoV-2 | 0.821235 |

**Supplementary Table 2.**

| **S.No.** | **Sample_ID** | **Cancer_Type** | **Mutants** | **Function** | **Score** |
| --- | --- | --- | --- | --- | --- |
| 1 | JSC1_HAEMATOPOIETIC_AND_LYMPHOID_TISSUE | Mixed Cancer Types | S5F | Abolished Binding with SARS-CoV-2 | 0.985613 |
| 2 | JHOS2_OVARY | Mixed Cancer Types | V184A | Abolished Binding with SARS-CoV-2 | 0.981135 |
| 3 | HEC59_ENDOMETRIUM | Mixed Cancer Types | S218N | Abolished Binding with SARS-CoV-2 | 0.984853 |
| 4 | SUDHL10_HAEMATOPOIETIC_AND_LYMPHOID_TISSUE | Mixed Cancer Types | T276K | Abolished Binding with SARS-CoV-2 | 0.994237 |
| 5 | MCC26_SKIN | Mixed Cancer Types | N322I | Abolished Binding with SARS-CoV-2 | 0.987779 |
| 6 | CAL54_KIDNEY | Mixed Cancer Types | T334A | Abolished Binding with SARS-CoV-2 | 0.988042 |
| 7 | LS411N_LARGE_INTESTINE | Mixed Cancer Types | Q472P | Abolished Binding with SARS-CoV-2 | 0.98643 |
| 8 | HCC_2998 | Colorectal Adenocarcinoma | F603C, K619N | Abolished Binding with SARS-CoV-2 | 0.965011 |
| 9 | HCC2998_LARGE_INTESTINE | Mixed Cancer Types | F603C, K619N | Abolished Binding with SARS-CoV-2 | 0.965011 |
| 10 | CORL32_LUNG | Mixed Cancer Types | W635L | Abolished Binding with SARS-CoV-2 | 0.910476 |
| 11 | HCT_15, HCT15_LARGE_INTESTINE | Colorectal Adenocarcinoma, Mixed Cancer Types | Y649C | Abolished Binding with SARS-CoV-2 | 0.995293 |
| 12 | JHUEM7_ENDOMETRIUM | Mixed Cancer Types | L664I, D382Y | Abolished Binding with SARS-CoV-2 | 0.98598 |
| 13 | MESSA_SOFT_TISSUE | Mixed Cancer Types | A782V | Abolished Binding with SARS-CoV-2 | 0.981695 |
| 14 | PECAPJ15_UPPER_AERODIGESTIVE_TRACT | Mixed Cancer Types | E668K | Abolished Binding with SARS-CoV-2 | 0.975889 |
| 15 | GMEL_SKIN | Mixed Cancer Types | E457K | Abolished Binding with SARS-CoV-2 | 0.990775 |
| 16 | EN_ENDOMETRIUM | Mixed Cancer Types | K416N | Abolished Binding with SARS-CoV-2 | 0.993628 |
| 17 | LS123_LARGE_INTESTINE | Mixed Cancer Types | A413V | Abolished Binding with SARS-CoV-2 | 0.927719 |
| 18 | HEC251_ENDOMETRIUM | Mixed Cancer Types | F314L, Y510H | Abolished Binding with SARS-CoV-2 | 0.951065 |
| 19 | NCIH513_PLEURA | Mixed Cancer Types | P253T | Abolished Binding with SARS-CoV-2 | 0.967574 |
| 20 | MCC13_SKIN | Mixed Cancer Types | E145K, E495K, I233S | Abolished Binding with SARS-CoV-2 | 0.990154 |
| 21 | OSRC2_KIDNEY | Mixed Cancer Types | L100V | Abolished Binding with SARS-CoV-2 | 0.974474 |
| 22 | ISHIKAWAHERAKLIO02ER_ENDOMETRIUM | Mixed Cancer Types | A25V | Abolished Binding with SARS-CoV-2 | 0.971063 |
| 23 | A172_CENTRAL_NERVOUS_SYSTEM | Mixed Cancer Types | Y252C | No Impact on Binding with SARS-CoV-2 | 0.870041 |
| 24 | LU165_LUNG | Mixed Cancer Types | P426L | No Impact on Binding with SARS-CoV-2 | 0.835433 |
| 25 | TMK1_STOMACH | Mixed Cancer Types | P612L | No Impact on Binding with SARS-CoV-2 | 0.851625 |

**Supplementary Table 3.**

| **Complexes** | **Experimentally Verified** | **Docking Verified** | | | | | | | | | | | | | |  |  |
| --- | --- | --- | --- | --- | --- | --- | --- | --- | --- | --- | --- | --- | --- | --- | --- | --- | --- |
| **ZDOCK** | | **CLUSPRO** | | **HDOCK** | | **PATCHDOCK** | | **INTEREVDOCK** | | **SOAP PP** | | **FRODOCK2** | | **INFERENCE SARS-CoV** | **INFERENCE SARS-CoV-2** |
| **wild** | **Binds with SARS-CoV** | **Binds with SARS-CoV** | Binds with SARS-CoV-2 | **Binds with SARS-CoV** | Binds with SARS-CoV-2 | **Binds with SARS-CoV** | Binds with SARS-CoV-2 | **Binds with SARS-CoV** | Binds with SARS-CoV-2 | **Binds with SARS-CoV** | Binds with SARS-CoV-2 | **Binds with SARS-CoV** | Binds with SARS-CoV-2 | **Binds with SARS-CoV** | Binds with SARS-CoV-2 | **Binds with SARS-CoV** |  |
| K31D | Inhibition | Inhibition | Inhibition | Inhibition | No Inhibition | Inhibition | No Inhibition | No Inhibition | Inhibition | **No Inhibition/Highest Affinity** | Neutral | Inhibition | Inhibition | No Inhibition | Inhibition | **C. Inhibition = 4/7**  **No inhibition = 3/7** | **Inhibition = 4/7**  **No inhibition = 3/7** |
| E37A | No Inhibition | No Inhibition | No Inhibition | No Inhibition | No Inhibition | Inhibition | No Inhibition | No Inhibition | Inhibition | Inhibition | No Inhibition/Highest Affinity | Inhibition | Inhibition | No Inhibition | Inhibition | **Inhibition = 3/7**  **C. No inhibition = 4/7** | **Inhibition = 3/7**  **No inhibition =4/7** |
| D38A | No Inhibition | No Inhibition | No Inhibition | No Inhibition | No Inhibition | No Inhibition | No Inhibition | No Inhibition | Inhibition | **No Inhibition/Highest Affinity** | No Inhibition | Inhibition | Inhibition | No Inhibition | Inhibition | **Inhibition = 1/7**  **No inhibition = 6/7** | **Inhibition = 3/7**  **No inhibition = 4/7** |
| Y41A | Inhibition | Inhibition | Inhibition | **Inhibition/Lowest affinity** | Inhibition | **Inhibition/Lowest affinity** | No Inhibition | No Inhibition | **No Inhibition/Highest Affinity** | Inhibition | No Inhibition/Highest Affinity | No Inhibition | Inhibition | **No Inhibition/Highest Affinity** | Inhibition | **Inhibition = 4/7**  **No inhibition = 3/7** | **Inhibition = 4/7**  **No inhibition = 3/7** |
| K68D | Inhibition | No Inhibition | No Inhibition | **Inhibition/Lowest affinity** | Inhibition | No Inhibition | Inhibition | No Inhibition | Inhibition | **No Inhibition/Highest Affinity** | Neutral | Inhibition | Inhibition | Inhibition | No Inhibition | **Inhibition = 3/7**  **No inhibition = 4/7** | **Inhibition = 4/7**  **No inhibition = 3/7** |
| E110P | No Inhibition | No Inhibition | No Inhibition | No Inhibition | No Inhibition | No Inhibition | No Inhibition | No Inhibition | Inhibition | **No Inhibition/Highest Affinity** | Neutral | Inhibition | No Inhibition | Inhibition | Inhibition | **Inhibition = 2/7**  **No inhibition = 5/7** | **Inhibition = 2/7**  **No inhibition =5//7** |
| E160R | No Inhibition | No Inhibition | No Inhibition | No Inhibition | No Inhibition | Inhibition | Inhibition | No Inhibition | Inhibition | Inhibition | Neutral | Inhibition | Inhibition | Inhibition | Inhibition | **Inhibition = 4/7**  **No inhibition = 3/7** | **Inhibition = 4/7**  **No inhibition = 3/7** |
| R192D | No Inhibition | No Inhibition | Inhibition | Inhibition | No Inhibition | No Inhibition | No Inhibition | No Inhibition | Inhibition | **No Inhibition/Highest Affinity** | Inhibition | Inhibition | No Inhibition/Highest Affinity | Inhibition | No Inhibition | **Inhibition = 3/7**  **No inhibition = 4/7** | **Inhibition = 3/7**  **No inhibition = 4/7** |
| R219D | No Inhibition | **Inhibition/Lowest affinity** | No Inhibition | No Inhibition | Inhibition | **No Inhibition/Highest Affinity** | No Inhibition | No Inhibition | Inhibition | Inhibition | Inhibition | **No Inhibition/Highest Affinity** | Inhibition | Inhibition | **Inhibition/Lowest affinity** | **Inhibition = 3/7**  **No inhibition = 4/7** | **Inhibition = 5/7**  **No inhibition = 2/7** |
| H239Q | No Inhibition | No Inhibition | No Inhibition | Inhibition | Neutral | No Inhibition | No Inhibition | No Inhibition | Inhibition | **No Inhibition/Highest Affinity** | Neutral | Inhibition | Inhibition | Inhibition | No Inhibition | **Inhibition = 3/7**  **No inhibition = 4/7** | **Inhibition = 2/7**  **No inhibition = 5/7** |
| K309D | No Inhibition | Inhibition | **No Inhibition/Highest Affinity** | No Inhibition | No Inhibition | No Inhibition | No Inhibition | No Inhibition | Inhibition | **No Inhibition/Highest Affinity** | No Inhibition | Inhibition | Inhibition | Inhibition | No Inhibition | **Inhibition = 3/7**  **No inhibition = 4/7** | **Inhibition = 2/7**  **No inhibition = 5/7** |
| E312A | No Inhibition | No Inhibition | Inhibition | No Inhibition | No Inhibition | Inhibition | No Inhibition | No Inhibition | Inhibition | Inhibition | No Inhibition | No Inhibition | Inhibition | No Inhibition | Inhibition | **Inhibition = 2/7**  **No inhibition = 5/7** | **Inhibition = 4/7**  **No inhibition = 3/7** |
| T324A | No Inhibition | Inhibition | Inhibition | **Inhibition/Lowest affinity** | Neutral | No Inhibition | No Inhibition | No Inhibition | Inhibition | Inhibition | Neutral | Inhibition | Inhibition | Inhibition | Inhibition | **Inhibition = 5/7**  **No inhibition = 2/7** | **Inhibition = 4/7**  **No inhibition = 3/7** |
| D350A | No Inhibition | No Inhibition | No Inhibition | Inhibition | Inhibition | No Inhibition | Inhibition | No Inhibition | Inhibition | **No Inhibition/Highest Affinity** | Neutral | Inhibition | Inhibition | Inhibition | No Inhibition | **Inhibition = 3/7**  **No inhibition = 4/7** | **Inhibition = 4/7**  **No inhibition = 3/7** |
| K353H | Inhibition | No Inhibition | No Inhibition | No Inhibition | Inhibition | No Inhibition | No Inhibition | No Inhibition | Inhibition | **No Inhibition/Highest Affinity** | Neutral | Inhibition | Inhibition | No Inhibition | **No Inhibition/Highest Affinity** | **Inhibition = 1/7**  **No inhibition = 6/7** | **Inhibition = 3/7**  **No inhibition = 4/7** |
| K353A | Inhibition | No Inhibition | No Inhibition | No Inhibition | Inhibition | No Inhibition | No Inhibition | No Inhibition | Inhibition | Inhibition | No Inhibition/Highest Affinity | Inhibition | Inhibition | Inhibition | Inhibition | **Inhibition = 3/7**  **No inhibition = 4/7** | **Inhibition = 4/7**  **No inhibition = 3/7** |
| K353D | Inhibition | No Inhibition | No Inhibition | Inhibition | Inhibition | No Inhibition | No Inhibition | No Inhibition | Inhibition | **No Inhibition/Highest Affinity** | Neutral | Inhibition | No Inhibition | Inhibition | Inhibition | **Inhibition = 3/7**  **No inhibition = 4/7** | **Inhibition = 3/7**  **No inhibition = 4/7** |
| D355A | Inhibition | No Inhibition | No Inhibition | No Inhibition | Inhibition | No Inhibition | No Inhibition | No Inhibition | No Inhibition | Inhibition | Neutral | No Inhibition | **Inhibition/Lowest affinity** | Inhibition | Inhibition | **Inhibition = 2/7**  **No inhibition = 5/7** | **Inhibition = 3/7**  **No inhibition = 4/7** |
| R357A | Inhibition | No Inhibition | No Inhibition | No Inhibition | No Inhibition | No Inhibition | No Inhibition | No Inhibition | Inhibition | Inhibition | No Inhibition/Highest Affinity | Inhibition | Inhibition | No Inhibition | Inhibition | **Inhibition = 2/7**  **No inhibition = 5/7** | **Inhibition = 3/7**  **No inhibition = 4/7** |
| L359K | No Inhibition | No Inhibition | No Inhibition | No Inhibition | Inhibition/Lowest affinity | No Inhibition | Inhibition | No Inhibition | Inhibition | **Inhibition/Lowest affinity** | Neutral | Inhibition | Inhibition | Inhibition | Inhibition | **Inhibition = 2/7**  **No inhibition = 5/7** | **Inhibition = 5/7**  **No inhibition = 2/7** |
| L359A | No Inhibition | No Inhibition | Inhibition | No Inhibition | No Inhibition/Highest Affinity | No Inhibition | Inhibition | No Inhibition | Inhibition | Inhibition | Neutral | Inhibition | Inhibition | No Inhibition | No Inhibition | **Inhibition = 2/7**  **No inhibition = 5/7** | **Inhibition = 4/7**  **No inhibition = 3/7** |
| M383A | Inhibition | No Inhibition | Inhibition | Inhibition | No Inhibition | No Inhibition | No Inhibition | No Inhibition | Inhibition | **No Inhibition/Highest Affinity** | No Inhibition | Inhibition | No Inhibition | No Inhibition | Inhibition | **Inhibition = 2/7**  **No inhibition = 5/7** | **Inhibition = 3/7**  **No inhibition = 4/7** |
| P389A | Inhibition | No Inhibition | No Inhibition | **Inhibition/Lowest affinity** | Inhibition | No Inhibition | No Inhibition | No Inhibition | Inhibition | **No Inhibition/Highest Affinity** | Neutral | Inhibition | Inhibition | Inhibition | No Inhibition | **Inhibition = 3/7**  **No inhibition = 4/7** | **Inhibition = 3/7**  **No inhibition = 4/7** |
| R393A | Inhibition | No Inhibition | Inhibition | Inhibition | No Inhibition | No Inhibition | No Inhibition/Highest Affinity | No Inhibition | Inhibition | Inhibition | No Inhibition | No Inhibition | Inhibition | No Inhibition | Inhibition | **Inhibition = 2/7**  **No inhibition = 5/7** | **Inhibition = 4/7**  **No inhibition = 3/7** |
| R559S | Inhibition | Inhibition | Inhibition | Inhibition | Neutral | No Inhibition | No Inhibition | No Inhibition | Inhibition | Inhibition | Neutral | Inhibition | Inhibition | Inhibition | Inhibition | **Inhibition = 5/7**  **No inhibition = 2/7** | **Inhibition = 4/7**  **No inhibition = 3/7** |
| F603T | No Inhibition | Inhibition  0 | Inhibition | Inhibition | No Inhibition | No Inhibition | Inhibition | No Inhibition | Inhibition/Lowest affinity | Inhibition | Inhibition | Inhibition | Inhibition | Inhibition | Inhibition | **Inhibition = 5/7**  **No inhibition = 2/7** | **Inhibition = 6/7**  **No inhibition = 1/7** |
| Q24K, A25A, K26E | Inhibition | No Inhibition  0 | No Inhibition | No Inhibition | Inhibition | Inhibition | No Inhibition | No Inhibition | Inhibition | Inhibition | Neutral | Inhibition | Inhibition | Inhibition | Inhibition | **Inhibition = 4/7**  **No inhibition = 3/7** | **Inhibition = 1/7**  **No inhibition = 6/7** |
| M82N, Y83F, P84S | Inhibition | No Inhibition  0 | No Inhibition | **No Inhibition/Highest Affinity** | Inhibition | No Inhibition | Inhibition | No Inhibition | Inhibition | **No Inhibition/Highest Affinity** | Inhibition | Inhibition | Inhibition | Inhibition | Inhibition | **Inhibition = 2/7**  **No inhibition = 5/7** | **Inhibition = 6/7**  **No inhibition = 1/7** |
| P135S, D136M | No Inhibition | No Inhibition | **Inhibition/Lowest affinity** | Inhibition | Neutral | No Inhibition | Inhibition/Lowest affinity | No Inhibition | Inhibition | **No Inhibition/Highest Affinity** | Neutral | **Inhibition/Lowest affinity** | Inhibition | No Inhibition | No Inhibition | **Inhibition = 2/7**  **No inhibition = 5/7** | **Inhibition = 4/7**  **No inhibition = 3/7** |
| N338D, V339D, Q340R | No Inhibition | Inhibition | No Inhibition | Inhibition | No Inhibition | No Inhibition | Inhibition | No Inhibition | Inhibition | Inhibition | Inhibition/Lowest affinity | Inhibition | Inhibition | **Inhibition/Lowest affinity** | Inhibition | **Inhibition = 5/7**  **No inhibition = 2/7** | **Inhibition = 5/7**  **No inhibition = 2/7** |
| S425P, P426S, D427N | Inhibition | No Inhibition | No Inhibition | No Inhibition | Inhibition | No Inhibition | No Inhibition | No Inhibition | Inhibition | Inhibition | Neutral | Inhibition | No Inhibition | No Inhibition | No Inhibition | **Inhibition = 2/7**  **No inhibition = 5/7** | **Inhibition = 2/7**  **No inhibition = 5/7** |
| K465Q, G466D, E467K | No Inhibition | **No Inhibition/Highest Affinity** | No Inhibition | No Inhibition | No Inhibition | No Inhibition | Inhibition | **No Inhibition/Highest Affinity** | Inhibition | Inhibition | No Inhibition | Inhibition | No Inhibition | Inhibition | Inhibition | **Inhibition = 3/7**  **No inhibition = 4/7** | **Inhibition = 3/7**  **No inhibition = 4/7** |
| **Common BA between SARS-CoV and SARS-CoV-2** | NA | **Inhibition: 05**  **No Inhibition: 17**  **Total common between SARS-CoV& SARS-CoV-2: 22** | | **Inhibition: 05**  **No Inhibition: 09**  **Total common between SARS-CoV& SARS-CoV-2: 13** | | **Inhibition: 01**  **No Inhibition: 17**  **Total common between SARS-CoV& SARS-CoV-2: 18** | | **Inhibition: 0**  **No Inhibition: 2**  **Total common between SARS-CoV& SARS-CoV-2: 2** | | **Inhibition: 3**  **No Inhibition: 12**  **Total common between SARS-CoV& SARS-CoV-2: 15** | | **Inhibition: 21**  **No Inhibition: 0**  **Total common between SARS-CoV& SARS-CoV-2: 20** | | **Inhibition: 14**  **No Inhibition: 4**  **Total common between SARS-CoV& SARS-CoV-2: 18** | |  |  |
| **CorrelatedScore**  **SARS-CoV& CoV-2** | Inhibition: 15/15  No inhibition: 17/17 | Inhibition: 3/15  No inhibition: 12/17  Tot: 15/32 | Inhibition: 5/15  No inhibition: 11/17  Tot: 16/32 | Inhibition: 8/15  No inhibition: 10/17  Tot: 18/32 | Inhibition: 10/15  No inhibition: 14/17**(H)**  Tot: 24/32 | Inhibition: 3/15  No inhibition: 14/17  Tot: 17/32 | Inhibition: 2/15  No inhibition: 9/17  Tot: 11/32 | Inhibition: 0/15  No inhibition: 17/17**(H)**  Tot: 17/32 | Inhibition: 13/15**(H)**  No inhibition: 0/17  Tot: 13/32 | Inhibition: 8/15  No inhibition: 7/17  Tot: 15/32 | Inhibition: 1/15  No inhibition: 13/17  Tot: 14/32 | Inhibition: 12/15**(H)**  No inhibition: 2/17  Tot: 14/32 | Inhibition: 12/15  No inhibition: 3/17  Tot: 15/32 | Inhibition: 8/15  No inhibition: 5/17  Tot: 13/32 | Inhibition: 11/15  No inhibition: 6/17  Tot: 17/32 |  |  |
|  | **EXP.** | **Cov** | **Cov-2** | **Cov** | **Cov-2** | **Cov** | **Cov-2** | **Cov** | **Cov-2** | **Cov** | **Cov-2** | **Cov** | **Cov-2** | **Cov** | **Cov-2** |  |  |
| **Complexes** | **Experimetally** | **ZDOCK** | | **CLUSPRO** | | **HDOCK** | | **PATCHDOCK** | | **INTEREVDOCK** | | **SOAP PP** | | **FRODOCK2** | |  |  |

**Supplementary Table 4.**

| **Complexes** | **Validated tool** | | **Docking Verified** | | | | | | | | | | | |  |  |
| --- | --- | --- | --- | --- | --- | --- | --- | --- | --- | --- | --- | --- | --- | --- | --- | --- |
| **(ClusPro)** | | **ZDOCK** | | **HDOCK** | | **PATCHDOCK** | | **INTEREVDOCK** | | **SOAP PP** | | **FRODOCK2** | | **INFERENCE** | **INFERENCE** |
| **Wild** | **Binds with SARS-CoV** | **Binds with SARS-CoV-2** | **Binds with SARS-CoV** | **Binds with SARS-CoV-2** | **Binds with SARS-CoV** | **Binds with SARS-CoV-2** | **Binds with SARS-CoV** | **Binds with SARS-CoV-2** | **Binds with SARS-CoV** | **Binds with SARS-CoV-2** | **Binds with SARS-CoV** | **Binds with SARS-CoV-2** | **Binds with SARS-CoV** | **Binds with SARS-CoV-2** | **Binds with SARS-CoV** | **Binds with SARS-CoV-2** |
| L8F | Neutral | Neutral | Inhibition | No Inhibition | Neutral | Neutral | Neutral | Neutral | Neutral | Neutral | Neutral | Neutral | Neutral | Neutral | Inhibition = 1/7  No Inhibition =6/7 | Inhibition = 0/7  No Inhibition = 7/7 |
| T20I | Neutral | No Inhibition | Inhibition | Inhibition | Neutral | Neutral | Neutral | Neutral | Neutral | Neutral | Neutral | Neutral | Neutral | Neutral | Inhibition = 1/7  No Inhibition = 6/7 | Inhibition = 1/7  No Inhibition = 6/7 |
| E22D | No Inhibition | No Inhibition | No Inhibition | Inhibition | Inhibition | Inhibition | No Inhibition | Inhibition | Inhibition | Neutral | Inhibition | No Inhibition | Inhibition | Inhibition | Inhibition = 4/7  No Inhibition = 3/7 | Inhibition = 4/7  No Inhibition = 3/7 |
| F28L | No Inhibition | Inhibition | No Inhibition | No Inhibition | No Inhibition | Inhibition | No Inhibition | Inhibition | No Inhibition | No Inhibition | Inhibition | Inhibition | Inhibition | Inhibition | Inhibition = 2/7  No Inhibition = 5/7 | Inhibition = 5/7  No Inhibition = 2/7 |
| H34N | Inhibition | Neutral | No Inhibition | Inhibition | Inhibition | No Inhibition | No Inhibition | Inhibition | Inhibition | No Inhibition | Inhibition | No Inhibition | No Inhibition | Inhibition | Inhibition = 4/7  No Inhibition = 3/7 | Inhibition = 3/7  No Inhibition = 4/7 |
| E35K | Inhibition | No Inhibition | No Inhibition | Inhibition | No Inhibition | No Inhibition | No Inhibition | Inhibition | Inhibition | Neutral | No Inhibition | Inhibition | Inhibition | No Inhibition | Inhibition = 3/7  No Inhibition = 4/7 | Inhibition = 3/7  No Inhibition = 4/7 |
| E37K | Inhibition | Neutral | No Inhibition | Inhibition | No Inhibition | No Inhibition | No Inhibition | Inhibition | Inhibition | No Inhibition | Inhibition | No Inhibition | Inhibition | No Inhibition | Inhibition = 4/7  No Inhibition = 3/7 | Inhibition = 2/7  No Inhibition = 5/7 |
| L39M | Inhibition | Inhibition | No Inhibition | No Inhibition | Inhibition | Inhibition | No Inhibition | Inhibition | No Inhibition | No Inhibition | Inhibition | Inhibition | Inhibition | No Inhibition | Inhibition = 4/7  No Inhibition = 3/7 | Inhibition = 4/7  No Inhibition = 3/7 |
| S44L | No Inhibition | Inhibition | No Inhibition | No Inhibition | No Inhibition | Inhibition | No Inhibition | Inhibition | No Inhibition | Neutral | Inhibition | Inhibition | Inhibition | Inhibition | Inhibition = 2/7  No Inhibition = 5/7 | Inhibition = 5/7  No Inhibition = 2/7 |
| V59D | No Inhibition | Inhibition | Inhibition | No Inhibition | Inhibition | Inhibition | No Inhibition | Inhibition | Inhibition | Neutral | Inhibition | Inhibition | Inhibition | Inhibition | Inhibition = 5/7  No Inhibition = 2/7 | Inhibition = 5/7  No Inhibition = 2/7 |
| F72C | Inhibition | Inhibition | Inhibition | Inhibition | Inhibition | No Inhibition | No Inhibition | No Inhibition | No Inhibition | No Inhibition | Inhibition | Inhibition | Inhibition | Inhibition | Inhibition = 5/7  No Inhibition = 2/7 | Inhibition = 4/7  No Inhibition = 3/7 |
| L73S | Inhibition | No Inhibition | No Inhibition | Inhibition | Inhibition | No Inhibition | No Inhibition | Inhibition | No Inhibition | Neutral | Inhibition | Inhibition | Inhibition | Inhibition | Inhibition = 4/7  No Inhibition = 3/7 | Inhibition = 4/7  No Inhibition = 3/7 |
| A99S | Inhibition | Inhibition | No Inhibition | No Inhibition | Inhibition | No Inhibition | No Inhibition | Inhibition | No Inhibition | Neutral | Inhibition | Inhibition | Inhibition | No Inhibition | Inhibition = 4/7  No Inhibition = 3/7 | Inhibition = 3/7  No Inhibition = 4/7 |
| S109L | No Inhibition | No Inhibition | No Inhibition | No Inhibition | No Inhibition | Inhibition | No Inhibition | Inhibition | Inhibition | Inhibition | Inhibition | Inhibition | No Inhibition | No Inhibition | Inhibition = 2/7  No Inhibition = 5/7 | Inhibition = 4/7  No Inhibition = 3/7 |
| R115Q | No Inhibition | No Inhibition | No Inhibition | No Inhibition | No Inhibition | Inhibition | No Inhibition | Inhibition | No Inhibition | Neutral | Inhibition | Inhibition | Inhibition | Inhibition | Inhibition = 2/7  No Inhibition = 5/7 | Inhibition = 4/7  No Inhibition = 3/7 |
| R115W | Inhibition | Neutral | No Inhibition | Inhibition | No Inhibition | Inhibition | No Inhibition | Inhibition | No Inhibition | Inhibition | Inhibition | Inhibition | No Inhibition | Inhibition | Inhibition = 2/7  No Inhibition = 5/7 | Inhibition = 6/7  No Inhibition = 1/7 |
| L116F | Inhibition | Inhibition | No Inhibition | No Inhibition | No Inhibition | No Inhibition | No Inhibition | Inhibition | No Inhibition | Inhibition | Inhibition | Inhibition | Inhibition | Inhibition | Inhibition = 3/7  No Inhibition = 4/7 | Inhibition = 5/7  No Inhibition = 2/7 |
| P138S | Inhibition | Inhibition | Inhibition | Inhibition | No Inhibition | Inhibition | No Inhibition | Neutral | No Inhibition | Neutral | Inhibition | Inhibition | Inhibition | No Inhibition | Inhibition = 4/7  No Inhibition = 3/7 | Inhibition = 4/7  No Inhibition = 3/7 |
| G147V | No Inhibition | Inhibition | No Inhibition | No Inhibition | No Inhibition | No Inhibition | No Inhibition | Inhibition | Inhibition | Neutral | Inhibition | Inhibition | Inhibition | Inhibition | Inhibition = 3/7  No Inhibition = 4/7 | Inhibition = 4/7  No Inhibition = 3/7 |
| L162F | No Inhibition | No Inhibition | No Inhibition | No Inhibition | No Inhibition | No Inhibition | No Inhibition | Inhibition | No Inhibition | Neutral | Inhibition | Inhibition | No Inhibition | No Inhibition | Inhibition = 1/7  No Inhibition = 6/7 | Inhibition = 2/7  No Inhibition = 5/7 |
| E182D | No Inhibition | Inhibition | No Inhibition | Inhibition | No Inhibition | No Inhibition | No Inhibition | Inhibition | No Inhibition | Neutral | Inhibition | Inhibition | Inhibition | Inhibition | Inhibition = 2/7  No Inhibition = 5/7 | Inhibition = 5/7  No Inhibition = 2/7 |
| E189K | Inhibition | No Inhibition | No Inhibition | No Inhibition | No Inhibition | No Inhibition | No Inhibition | Inhibition | Inhibition | Neutral | Inhibition | No Inhibition | Inhibition | No Inhibition | Inhibition = 4/7  No Inhibition = 3/7 | Inhibition = 1/7  No Inhibition = 6/7 |
| H195Y | Inhibition | No Inhibition | No Inhibition | No Inhibition | No Inhibition | No Inhibition | No Inhibition | Inhibition | Inhibition | Neutral | Inhibition | Inhibition | No Inhibition | No Inhibition | Inhibition = 3/7  No Inhibition = 4/7 | Inhibition = 2/7  No Inhibition = 5/7 |
| Y202H | No Inhibition | No Inhibition | No Inhibition | No Inhibition | Inhibition | No Inhibition | No Inhibition | Inhibition | Inhibition | Neutral | Inhibition | Inhibition | Inhibition | No Inhibition | Inhibition = 4/7  No Inhibition = 3/7 | Inhibition = 2/7  No Inhibition = 5/7 |
| R204I | Inhibition | Inhibition | Inhibition | No Inhibition | No Inhibition | No Inhibition | No Inhibition | Inhibition | Inhibition | Inhibition | No Inhibition | Inhibition | Inhibition | Inhibition | Inhibition = 4/7  No Inhibition = 3/7 | Inhibition = 5/7  No Inhibition = 2/7 |
| G205V | Inhibition | Inhibition | Inhibition | No Inhibition | Inhibition | Inhibition | No Inhibition | Inhibition | Inhibition | Inhibition | Inhibition | Inhibition | No Inhibition | Inhibition | Inhibition = 5/7  No Inhibition = 2/7 | Inhibition = 6/7  No Inhibition = 1/7 |
| D206Y | No Inhibition | No Inhibition | No Inhibition | No Inhibition | No Inhibition | Inhibition | No Inhibition | Inhibition | No Inhibition | Inhibition | Inhibition | Inhibition | No Inhibition | No Inhibition | Inhibition = 1/7  No Inhibition = 6/7 | Inhibition = 4/7  No Inhibition = 3/7 |
| G211W | No Inhibition | No Inhibition | No Inhibition | Inhibition | No Inhibition | Inhibition | No Inhibition | Inhibition | No Inhibition | Inhibition | Inhibition | Inhibition | No Inhibition | Inhibition | Inhibition = 1/7  No Inhibition = 6/7 | Inhibition = 6/7  No Inhibition = 1/7 |
| V212I | Neutral | No Inhibition | No Inhibition | No Inhibition | Inhibition | Inhibition | No Inhibition | Inhibition | No Inhibition | Neutral | Inhibition | No Inhibition | No Inhibition | No Inhibition | Inhibition = 2/7  No Inhibition = 5/7 | Inhibition = 2/7  No Inhibition = 5/7 |
| D213G | No Inhibition | Inhibition | No Inhibition | No Inhibition | No Inhibition | No Inhibition | No Inhibition | Inhibition | Inhibition | No Inhibition | Inhibition | Inhibition | Inhibition | Inhibition | Inhibition = 3/7  No Inhibition = 4/7 | Inhibition = 4/7  No Inhibition = 3/7 |
| R219P | No Inhibition | Inhibition | Inhibition | No Inhibition | No Inhibition | No Inhibition | No Inhibition | Inhibition | Inhibition | Inhibition | No Inhibition | Inhibition | Inhibition | Inhibition | Inhibition = 3/7  No Inhibition = 4/7 | Inhibition = 5/7  No Inhibition = 2/7 |
| R219H | No Inhibition | Inhibition | Inhibition | No Inhibition | Inhibition | No Inhibition | No Inhibition | Inhibition | Inhibition | Inhibition | No Inhibition | Inhibition | No Inhibition | Inhibition | Inhibition = 3/7  No Inhibition = 4/7 | Inhibition = 5/7  No Inhibition = 2/7 |
| G220C | No Inhibition | Inhibition | No Inhibition | No Inhibition | No Inhibition | No Inhibition | No Inhibition | Inhibition | Inhibition | Neutral | Inhibition | No Inhibition | Inhibition | Inhibition | Inhibition = 3/7  No Inhibition = 4/7 | Inhibition = 3/7  No Inhibition = 4/7 |
| E232K | No Inhibition | No Inhibition | No Inhibition | No Inhibition | Inhibition | No Inhibition | No Inhibition | Inhibition | Inhibition | Neutral | Inhibition | Inhibition | Inhibition | No Inhibition | Inhibition = 4/7  No Inhibition = 3/7 | Inhibition = 2/7  No Inhibition = 5/7 |
| A242T | No Inhibition | No Inhibition | No Inhibition | No Inhibition | Inhibition | No Inhibition | No Inhibition | Inhibition | No Inhibition | Neutral | Inhibition | Inhibition | Inhibition | Inhibition | Inhibition = 3/7  No Inhibition = 4/7 | Inhibition = 3/7  No Inhibition = 4/7 |
| I256M | Inhibition | Neutral | No Inhibition | Inhibition | No Inhibition | No Inhibition | No Inhibition | Inhibition | Neutral | Neutral | Inhibition | No Inhibition | Inhibition | No Inhibition | Inhibition = 3/7  No Inhibition = 4/7 | Inhibition = 2/7  No Inhibition = 5/7 |
| A264S | No Inhibition | No Inhibition | Inhibition | Inhibition | No Inhibition | No Inhibition | No Inhibition | Inhibition | Inhibition | Neutral | Inhibition | Inhibition | Neutral | Inhibition | Inhibition = 3/7  No Inhibition = 4/7 | Inhibition = 4/7  No Inhibition = 3/7 |
| D269N | Inhibition | Inhibition | Inhibition | Inhibition | No Inhibition | Inhibition | No Inhibition | Inhibition | No Inhibition | No Inhibition | Inhibition | Inhibition | Inhibition | No Inhibition | Inhibition = 4/7  No Inhibition = 3/7 | Inhibition = 5/7  No Inhibition = 2/7 |
| D269Y | Inhibition | Inhibition | No Inhibition | Inhibition | Inhibition | No Inhibition | No Inhibition | Inhibition | Inhibition | Neutral | Inhibition | Inhibition | Inhibition | No Inhibition | Inhibition = 5/7  No Inhibition = 2/7 | Inhibition = 4/7  No Inhibition = 3/7 |
| G272C | No Inhibition | Inhibition | No Inhibition | Inhibition | No Inhibition | No Inhibition | No Inhibition | Inhibition | No Inhibition | No Inhibition | Inhibition | No Inhibition | No Inhibition | Inhibition | Inhibition = 1/7  No Inhibition = 6/7 | Inhibition = 4/7  No Inhibition = 3/7 |
| R273K | Inhibition | Neutral | No Inhibition | Inhibition | No Inhibition | No Inhibition | No Inhibition | Inhibition | Inhibition | Neutral | Inhibition | Inhibition | Inhibition | No Inhibition | Inhibition = 4/7  No Inhibition = 3/7 | Inhibition = 3/7  No Inhibition = 4/7 |
| S280Y | Inhibition | No Inhibition | No Inhibition | No Inhibition | No Inhibition | No Inhibition | No Inhibition | Inhibition | No Inhibition | Neutral | Inhibition | Inhibition | Inhibition | Inhibition | Inhibition = 3/7  No Inhibition = 4/7 | Inhibition = 3/7  No Inhibition = 4/7 |
| V293I | Inhibition | Inhibition | No Inhibition | Inhibition | No Inhibition | Inhibition | No Inhibition | Inhibition | No Inhibition | Neutral | Inhibition | No Inhibition | Inhibition | Inhibition | Inhibition = 3/7  No Inhibition = 4/7 | Inhibition = 5/7  No Inhibition = 2/7 |
| A296T | Inhibition | Inhibition | No Inhibition | No Inhibition | No Inhibition | No Inhibition | No Inhibition | Inhibition | No Inhibition | Neutral | Inhibition | Inhibition | Inhibition | Inhibition | Inhibition = 3/7  No Inhibition = 4/7 | Inhibition = 4/7  No Inhibition = 3/7 |
| Q305L | Inhibition | No Inhibition | No Inhibition | Inhibition | No Inhibition | No Inhibition | No Inhibition | Inhibition | Inhibition | No Inhibition | Inhibition | Inhibition | Inhibition | No Inhibition | Inhibition = 4/7  No Inhibition = 3/7 | Inhibition = 3/7  No Inhibition = 4/7 |
| A311V | Inhibition | No Inhibition | No Inhibition | No Inhibition | No Inhibition | No Inhibition | No Inhibition | Inhibition | No Inhibition | Neutral | Inhibition | Inhibition | Inhibition | No Inhibition | Inhibition = 3/7  No Inhibition = 4/7 | Inhibition = 2/7  No Inhibition = 5/7 |
| S317F | No Inhibition | Inhibition | Inhibition | Inhibition | No Inhibition | No Inhibition | No Inhibition | Inhibition | No Inhibition | Inhibition | Inhibition | Inhibition | Inhibition | No Inhibition | Inhibition = 3/7  No Inhibition = 4/7 | Inhibition = 5/7  No Inhibition = 2/7 |
| L320F | Inhibition | No Inhibition | No Inhibition | No Inhibition | No Inhibition | No Inhibition | No Inhibition | Inhibition | No Inhibition | Neutral | Inhibition | Inhibition | No Inhibition | No Inhibition | Inhibition = 2/7  No Inhibition = 5/7 | Inhibition = 2/7  No Inhibition = 5/7 |
| T324S | Inhibition | Neutral | No Inhibition | No Inhibition | No Inhibition | No Inhibition | No Inhibition | Inhibition | No Inhibition | Neutral | Inhibition | Inhibition | Inhibition | No Inhibition | Inhibition = 3/7  No Inhibition = 4/7 | Inhibition = 2/7  No Inhibition = 5/7 |
| Q325P | No Inhibition | Inhibition | Inhibition | No Inhibition | Inhibition | No Inhibition | No Inhibition | Inhibition | Inhibition | No Inhibition | Inhibition | No Inhibition | Inhibition | Inhibition | Inhibition = 5/7  No Inhibition = 2/7 | Inhibition = 3/7  No Inhibition = 4/7 |
| N330H | Neutral | Neutral | No Inhibition | Inhibition | No Inhibition | Inhibition | No Inhibition | Inhibition | Inhibition | Neutral | Inhibition | Inhibition | Inhibition | Inhibition | Inhibition = 3/7  No Inhibition = 4/7 | Inhibition = 5/7  No Inhibition = 2/7 |
| T334R | No Inhibition | No Inhibition | No Inhibition | No Inhibition | No Inhibition | No Inhibition | No Inhibition | Inhibition | Neutral | Inhibition | Inhibition | Inhibition | Inhibition | No Inhibition | Inhibition = 2/7  No Inhibition = 5/7 | Inhibition = 3/7  No Inhibition = 4/7 |
| G337E | Inhibition | Inhibition | No Inhibition | Inhibition | No Inhibition | No Inhibition | No Inhibition | Inhibition | No Inhibition | Inhibition | Inhibition | Inhibition | Inhibition | No Inhibition | Inhibition = 3/7  No Inhibition = 4/7 | Inhibition = 5/7  No Inhibition = 2/7 |
| N338D | Inhibition | Inhibition | No Inhibition | Inhibition | Inhibition | No Inhibition | No Inhibition | Inhibition | No Inhibition | Neutral | Inhibition | Inhibition | Inhibition | No Inhibition | Inhibition = 4/7  No Inhibition = 3/7 | Inhibition = 4/7  No Inhibition = 3/7 |
| G352W | No Inhibition | Inhibition | No Inhibition | No Inhibition | No Inhibition | Inhibition | No Inhibition | Inhibition | No Inhibition | Inhibition | Inhibition | Inhibition | Inhibition | Inhibition | Inhibition = 2/7  No Inhibition = 5/7 | Inhibition = 6/7  No Inhibition = 1/7 |
| D355N | Inhibition | Neutral | Inhibition | Inhibition | No Inhibition | No Inhibition | No Inhibition | Inhibition | Neutral | Neutral | Inhibition | Inhibition | Inhibition | Inhibition | Inhibition = 4/7  No Inhibition = 3/7 | Inhibition = 4/7  No Inhibition = 3/7 |
| R357S | No Inhibition | Inhibition | No Inhibition | No Inhibition | Inhibition | Inhibition | No Inhibition | Inhibition | Inhibition | Neutral | Inhibition | Inhibition | Inhibition | Inhibition | Inhibition = 4/7  No Inhibition = 3/7 | Inhibition = 5/7  No Inhibition = 2/7 |
| I358F | Inhibition | No Inhibition | No Inhibition | No Inhibition | Inhibition | No Inhibition | No Inhibition | Inhibition | No Inhibition | Neutral | Inhibition | Inhibition | Inhibition | Inhibition | Inhibition = 4/7  No Inhibition = 3/7 | Inhibition = 3/7  No Inhibition = 4/7 |
| V364A | Inhibition | Neutral | No Inhibition | No Inhibition | No Inhibition | No Inhibition | No Inhibition | Inhibition | Inhibition | Neutral | Inhibition | Inhibition | No Inhibition | No Inhibition | Inhibition = 3/7  No Inhibition = 4/7 | Inhibition = 2/7  No Inhibition = 5/7 |
| D367V | No Inhibition | No Inhibition | No Inhibition | No Inhibition | No Inhibition | No Inhibition | No Inhibition | Inhibition | No Inhibition | Neutral | Inhibition | Inhibition | Inhibition | No Inhibition | Inhibition = 2/7  No Inhibition = 5/7 | Inhibition = 2/7  No Inhibition = 5/7 |
| D368N | Inhibition | Neutral | No Inhibition | Inhibition | Inhibition | No Inhibition | No Inhibition | Inhibition | No Inhibition | Neutral | Inhibition | Inhibition | No Inhibition | No Inhibition | Inhibition = 3/7  No Inhibition = 4/7 | Inhibition = 3/7  No Inhibition = 4/7 |
| M383I | Inhibition | Inhibition | Inhibition | Inhibition | No Inhibition | No Inhibition | No Inhibition | Inhibition | Neutral | No Inhibition | Inhibition | Inhibition | Inhibition | Inhibition | Inhibition = 4/7  No Inhibition = 3/7 | Inhibition = 5/7  No Inhibition = 2/7 |
| R393G | Inhibition | No Inhibition | No Inhibition | Inhibition | No Inhibition | Inhibition | No Inhibition | Inhibition | Inhibition | No Inhibition | Inhibition | Inhibition | Inhibition | Inhibition | Inhibition = 4/7  No Inhibition = 3/7 | Inhibition = 5/7  No Inhibition = 2/7 |
| G395V | Inhibition | No Inhibition | No Inhibition | No Inhibition | No Inhibition | Inhibition | No Inhibition | Inhibition | No Inhibition | Neutral | Inhibition | Inhibition | Inhibition | Inhibition | Inhibition = 3/7  No Inhibition = 4/7 | Inhibition = 4/7  No Inhibition = 3/7 |
| E398K | Inhibition | No Inhibition | No Inhibition | No Inhibition | No Inhibition | No Inhibition | No Inhibition | Inhibition | Inhibition | Inhibition | Inhibition | No Inhibition | No Inhibition | No Inhibition | Inhibition = 3/7  No Inhibition = 4/7 | Inhibition = 2/7  No Inhibition = 5/7 |
| G399R | No Inhibition | Inhibition | No Inhibition | No Inhibition | No Inhibition | No Inhibition | No Inhibition | Inhibition | No Inhibition | Neutral | Inhibition | Inhibition | No Inhibition | Inhibition | Inhibition = 1/7  No Inhibition = 6/7 | Inhibition = 4/7  No Inhibition = 3/7 |
| A403V | Inhibition | Neutral | No Inhibition | Inhibition | No Inhibition | No Inhibition | No Inhibition | Inhibition | No Inhibition | Neutral | Inhibition | Inhibition | No Inhibition | No Inhibition | Inhibition = 2/7  No Inhibition = 5/7 | Inhibition = 3/7  No Inhibition = 4/7 |
| G405W | No Inhibition | Inhibition | No Inhibition | No Inhibition | No Inhibition | No Inhibition | No Inhibition | Inhibition | No Inhibition | Neutral | Inhibition | Inhibition | Inhibition | No Inhibition | Inhibition = 2/7  No Inhibition = 5/7 | Inhibition = 3/7  No Inhibition = 4/7 |
| E406K | Inhibition | No Inhibition | No Inhibition | Inhibition | Inhibition | No Inhibition | No Inhibition | Inhibition | Inhibition | Neutral | Inhibition | Inhibition | Inhibition | Inhibition | Inhibition = 5/7  No Inhibition = 2/7 | Inhibition = 4/7  No Inhibition = 3/7 |
| S409L | Inhibition | No Inhibition | No Inhibition | No Inhibition | Inhibition | No Inhibition | No Inhibition | No Inhibition | No Inhibition | Neutral | Inhibition | Inhibition | Inhibition | Inhibition | Inhibition = 4/7  No Inhibition = 3/7 | Inhibition = 2/7  No Inhibition = 5/7 |
| A412T | No Inhibition | No Inhibition | No Inhibition | No Inhibition | No Inhibition | No Inhibition | No Inhibition | Inhibition | No Inhibition | Neutral | Inhibition | Inhibition | Inhibition | Inhibition | Inhibition = 2/7  No Inhibition = 5/7 | Inhibition = 3/7  No Inhibition = 4/7 |
| K419T | No Inhibition | No Inhibition | No Inhibition | No Inhibition | Inhibition | No Inhibition | No Inhibition | Inhibition | Inhibition | Inhibition | Inhibition | No Inhibition | No Inhibition | Inhibition | Inhibition = 3/7  No Inhibition = 4/7 | Inhibition = 3/7  No Inhibition = 4/7 |
| P426L | Inhibition | Inhibition | No Inhibition | No Inhibition | No Inhibition | Inhibition | No Inhibition | Inhibition | No Inhibition | Neutral | Inhibition | Inhibition | Inhibition | Inhibition | Inhibition = 3/7  No Inhibition = 4/7 | Inhibition = 5/7  No Inhibition = 2/7 |
| P426S | Inhibition | Neutral | No Inhibition | No Inhibition | No Inhibition | No Inhibition | No Inhibition | Inhibition | Inhibition | Neutral | Inhibition | Inhibition | Inhibition | No Inhibition | Inhibition = 4/7  No Inhibition = 3/7 | Inhibition = 2/7  No Inhibition = 5/7 |
| D431G | Inhibition | No Inhibition | No Inhibition | No Inhibition | No Inhibition | No Inhibition | No Inhibition | No Inhibition | Inhibition | Inhibition | Inhibition | Inhibition | Inhibition | Inhibition | Inhibition = 4/7  No Inhibition = 3/7 | Inhibition = 3/7  No Inhibition = 4/7 |
| L450P | No Inhibition | No Inhibition | No Inhibition | No Inhibition | No Inhibition | No Inhibition | No Inhibition | Inhibition | Inhibition | Neutral | Inhibition | Inhibition | Inhibition | Inhibition | Inhibition = 3/7  No Inhibition = 4/7 | Inhibition = 3/7  No Inhibition = 4/7 |
| K458T | No Inhibition | No Inhibition | No Inhibition | No Inhibition | No Inhibition | No Inhibition | No Inhibition | Inhibition | Inhibition | Neutral | Inhibition | Inhibition | Inhibition | No Inhibition | Inhibition = 3/7  No Inhibition = 4/7 | Inhibition = 2/7  No Inhibition = 5/7 |
| M462I | No Inhibition | No Inhibition | No Inhibition | No Inhibition | Inhibition | No Inhibition | No Inhibition | Inhibition | No Inhibition | Neutral | Inhibition | Inhibition | Inhibition | Inhibition | Inhibition = 3/7  No Inhibition = 4/7 | Inhibition = 3/7  No Inhibition = 4/7 |
| I468T | Inhibition | Neutral | No Inhibition | No Inhibition | No Inhibition | Inhibition | No Inhibition | Inhibition | Inhibition | Neutral | Inhibition | Inhibition | Inhibition | No Inhibition | Inhibition = 4/7  No Inhibition = 3/7 | Inhibition = 3/7  No Inhibition = 4/7 |
| W473L | Inhibition | No Inhibition | No Inhibition | No Inhibition | No Inhibition | No Inhibition | No Inhibition | Inhibition | No Inhibition | Neutral | Inhibition | Inhibition | Inhibition | Inhibition | Inhibition = 3/7  No Inhibition = 4/7 | Inhibition = 3/7  No Inhibition = 4/7 |
| W477R | Inhibition | No Inhibition | No Inhibition | No Inhibition | No Inhibition | No Inhibition | No Inhibition | Inhibition | Inhibition | Neutral | Inhibition | Inhibition | Inhibition | No Inhibition | Inhibition = 4/7  No Inhibition = 3/7 | Inhibition = 2/7  No Inhibition = 5/7 |
| V488M | No Inhibition | Inhibition | No Inhibition | No Inhibition | Inhibition | No Inhibition | No Inhibition | Inhibition | No Inhibition | Inhibition | No Inhibition | Inhibition | No Inhibition | No Inhibition | Inhibition = 1/7  No Inhibition = 6/7 | Inhibition = 4/7  No Inhibition = 3/7 |
| E489K | Inhibition | Neutral | No Inhibition | Inhibition | Inhibition | No Inhibition | No Inhibition | Inhibition | Inhibition | Neutral | Inhibition | No Inhibition | Inhibition | No Inhibition | Inhibition = 5/7  No Inhibition = 2/7 | Inhibition = 2/7  No Inhibition = 5/7 |
| V491L | No Inhibition | No Inhibition | No Inhibition | No Inhibition | Inhibition | No Inhibition | No Inhibition | Inhibition | No Inhibition | No Inhibition | Inhibition | No Inhibition | Inhibition | No Inhibition | Inhibition = 3/7  No Inhibition = 4/7 | Inhibition = 1/7  No Inhibition = 6/7 |
| D494G | Inhibition | Neutral | Inhibition | Inhibition | No Inhibition | Inhibition | No Inhibition | Inhibition | No Inhibition | Neutral | Inhibition | Inhibition | No Inhibition | Inhibition | Inhibition = 3/7  No Inhibition = 4/7 | Inhibition = 5/7  No Inhibition = 2/7 |
| T496A | Inhibition | No Inhibition | No Inhibition | Inhibition | Inhibition | No Inhibition | No Inhibition | Inhibition | No Inhibition | No Inhibition | Inhibition | No Inhibition | No Inhibition | Inhibition | Inhibition = 3/7  No Inhibition = 4/7 | Inhibition = 3/7  No Inhibition = 4/7 |
| R518M | No Inhibition | No Inhibition | No Inhibition | No Inhibition | No Inhibition | No Inhibition | No Inhibition | Inhibition | Inhibition | Neutral | Inhibition | Inhibition | No Inhibition | No Inhibition | Inhibition = 5/7  No Inhibition = 2/7 | Inhibition = 2/7  No Inhibition = 5/7 |
| G561R | No Inhibition | Inhibition | No Inhibition | No Inhibition | No Inhibition | No Inhibition | No Inhibition | Inhibition | No Inhibition | Neutral | Inhibition | Inhibition | Inhibition | No Inhibition | Inhibition = 2/7  No Inhibition = 5/7 | Inhibition = 3/7  No Inhibition = 4/7 |
| P565L | Inhibition | Inhibition | No Inhibition | No Inhibition | Inhibition | Inhibition | No Inhibition | Inhibition | No Inhibition | Neutral | Inhibition | Inhibition | Inhibition | Inhibition | Inhibition = 4/7  No Inhibition = 3/7 | Inhibition = 5/7  No Inhibition = 2/7 |
| K577N | Inhibition | No Inhibition | No Inhibition | Inhibition | No Inhibition | No Inhibition | No Inhibition | Inhibition | Inhibition | Neutral | Inhibition | No Inhibition | Inhibition | Inhibition | Inhibition = 4/7  No Inhibition = 3/7 | Inhibition = 3/7  No Inhibition = 4/7 |
| M579T | Inhibition | Neutral | Neutral | No Inhibition | Inhibition | No Inhibition | No Inhibition | Inhibition | Inhibition | Neutral | Inhibition | Inhibition | Inhibition | Inhibition | Inhibition = 5/7  No Inhibition = 2/7 | Inhibition = 3/7  No Inhibition = 4/7 |
| V581I | Inhibition | Inhibition | No Inhibition | No Inhibition | Inhibition | No Inhibition | No Inhibition | Inhibition | No Inhibition | Neutral | Inhibition | Inhibition | Inhibition | No Inhibition | Inhibition = 4/7  No Inhibition = 3/7 | Inhibition = 3/7  No Inhibition = 4/7 |
| P590L | Inhibition | Neutral | No Inhibition | Inhibition | No Inhibition | No Inhibition | No Inhibition | Inhibition | Inhibition | Neutral | Inhibition | Inhibition | No Inhibition | Inhibition | Inhibition = 3/7  No Inhibition = 4/7 | Inhibition = 4/7  No Inhibition = 3/7 |
| D597E | No Inhibition | No Inhibition | No Inhibition | No Inhibition | Inhibition | No Inhibition | No Inhibition | No Inhibition | Inhibition | Neutral | Inhibition | No Inhibition | Inhibition | Inhibition | Inhibition = 4/7  No Inhibition = 3/7 | Inhibition = 1/7  No Inhibition = 6/7 |
| N599K | No Inhibition | Inhibition | No Inhibition | Inhibition | No Inhibition | No Inhibition | No Inhibition | Inhibition | No Inhibition | Neutral | Inhibition | Inhibition | No Inhibition | No Inhibition | Inhibition = 1/7  No Inhibition = 6/7 | Inhibition = 4/7  No Inhibition = 3/7 |
| K600N | No Inhibition | No Inhibition | No Inhibition | No Inhibition | No Inhibition | No Inhibition | No Inhibition | Inhibition | Inhibition | Neutral | Inhibition | Inhibition | No Inhibition | No Inhibition | Inhibition = 2/7  No Inhibition = 5/7 | Inhibition = 2/7  No Inhibition = 5/7 |
| N601I | Inhibition | Neutral | No Inhibition | No Inhibition | No Inhibition | No Inhibition | No Inhibition | Inhibition | Neutral | Neutral | Inhibition | Inhibition | Inhibition | No Inhibition | Inhibition = 3/7  No Inhibition = 4/7 | Inhibition = 2/7  No Inhibition = 5/7 |
| D609N | Neutral | Inhibition | No Inhibition | No Inhibition | Inhibition | No Inhibition | No Inhibition | No Inhibition | Inhibition | Neutral | Inhibition | Inhibition | Inhibition | Inhibition | Inhibition = 4/7  No Inhibition = 3/7 | Inhibition = 3/7  No Inhibition = 4/7 |
| Y613H | Inhibition | Neutral | No Inhibition | Inhibition | No Inhibition | Inhibition | No Inhibition | Inhibition | No Inhibition | Neutral | Inhibition | Inhibition | Inhibition | No Inhibition | Inhibition = 3/7  No Inhibition = 4/7 | Inhibition = 4/7  No Inhibition = 3/7 |
| D615Y | No Inhibition | No Inhibition | No Inhibition | No Inhibition | Inhibition | No Inhibition | No Inhibition | Inhibition | No Inhibition | No Inhibition | Inhibition | Inhibition | Inhibition | Inhibition | Inhibition = 3/7  No Inhibition = 4/7 | Inhibition = 3/7  No Inhibition = 4/7 |
| I618M | No Inhibition | Inhibition | No Inhibition | No Inhibition | No Inhibition | No Inhibition | No Inhibition | No Inhibition | Inhibition | Neutral | Inhibition | Inhibition | Inhibition | Inhibition | Inhibition = 3/7  No Inhibition = 4/7 | Inhibition = 4/7  No Inhibition = 3/7 |
| K625T | Inhibition | Inhibition | No Inhibition | Inhibition | Inhibition | Inhibition | No Inhibition | Inhibition | No Inhibition | Neutral | Inhibition | Inhibition | Inhibition | Inhibition | Inhibition = 4/7  No Inhibition = 3/7 | Inhibition = 6/7  No Inhibition = 1/7 |
| L628F | No Inhibition | Inhibition | No Inhibition | No Inhibition | No Inhibition | No Inhibition | No Inhibition | Inhibition | No Inhibition | Inhibition | Inhibition | Inhibition | No Inhibition | No Inhibition | Inhibition = 1/7  No Inhibition = 6/7 | Inhibition = 4/7  No Inhibition = 3/7 |
| R644Q | No Inhibition | Neutral | Inhibition | Inhibition | No Inhibition | No Inhibition | No Inhibition | Inhibition | No Inhibition | Neutral | Inhibition | Inhibition | Inhibition | Inhibition | Inhibition = 3/7  No Inhibition = 4/7 | Inhibition = 4/7  No Inhibition = 3/7 |
| E667K | Inhibition | No Inhibition | No Inhibition | Inhibition | No Inhibition | No Inhibition | No Inhibition | Inhibition | No Inhibition | Neutral | Inhibition | Inhibition | Inhibition | Inhibition | Inhibition = 3/7  No Inhibition = 4/7 | Inhibition = 4/7  No Inhibition = 3/7 |
| V670L | No Inhibition | No Inhibition | No Inhibition | No Inhibition | No Inhibition | Inhibition | No Inhibition | Inhibition | No Inhibition | Neutral | Inhibition | Inhibition | Inhibition | Inhibition | Inhibition = 2/7  No Inhibition = 5/7 | Inhibition = 4/7  No Inhibition = 3/7 |
| V672A | Inhibition | Inhibition | No Inhibition | No Inhibition | No Inhibition | No Inhibition | No Inhibition | Inhibition | No Inhibition | Neutral | Inhibition | Inhibition | Inhibition | No Inhibition | Inhibition = 3/7  No Inhibition = 4/7 | Inhibition = 3/7  No Inhibition = 4/7 |
| K676E | Inhibition | No Inhibition | No Inhibition | Inhibition | No Inhibition | No Inhibition | No Inhibition | Inhibition | Inhibition | Neutral | Inhibition | Inhibition | No Inhibition | No Inhibition | Inhibition = 3/7  No Inhibition = 4/7 | Inhibition = 3/7  No Inhibition = 4/7 |
| F683L | No Inhibition | No Inhibition | No Inhibition | Inhibition | No Inhibition | No Inhibition | No Inhibition | Inhibition | Inhibition | Neutral | Inhibition | Inhibition | No Inhibition | No Inhibition | Inhibition = 2/7  No Inhibition = 5/7 | Inhibition = 3/7  No Inhibition = 4/7 |
| S692F | Inhibition | No Inhibition | No Inhibition | No Inhibition | No Inhibition | No Inhibition | No Inhibition | Inhibition | Inhibition | No Inhibition | Inhibition | Inhibition | Inhibition | Inhibition | Inhibition = 4/7  No Inhibition = 3/7 | Inhibition = 3/7  No Inhibition = 4/7 |
| D693N | No Inhibition | No Inhibition | No Inhibition | No Inhibition | No Inhibition | No Inhibition | No Inhibition | Inhibition | Inhibition | Neutral | Inhibition | No Inhibition | No Inhibition | No Inhibition | Inhibition = 2/7  No Inhibition = 5/7 | Inhibition = 1/7  No Inhibition = 6/7 |
| I694M | Inhibition | Inhibition | Inhibition | Inhibition | No Inhibition | No Inhibition | No Inhibition | Neutral | Inhibition | Neutral | No Inhibition | Inhibition | Inhibition | Inhibition | Inhibition = 4/7  No Inhibition = 3/7 | Inhibition = 4/7  No Inhibition = 3/7 |
| E701K | Inhibition | No Inhibition | No Inhibition | Inhibition | No Inhibition | No Inhibition | No Inhibition | Inhibition | Inhibition | Neutral | Inhibition | Inhibition | No Inhibition | No Inhibition | Inhibition = 3/7  No Inhibition = 4/7 | Inhibition = 3/7  No Inhibition = 4/7 |
| R708Q | Inhibition | Neutral | No Inhibition | Inhibition | Inhibition | No Inhibition | No Inhibition | Inhibition | Inhibition | Neutral | Inhibition | Inhibition | Inhibition | No Inhibition | Inhibition = 5/7  No Inhibition = 2/7 | Inhibition = 3/7  No Inhibition = 4/7 |
| D713N | No Inhibition | No Inhibition | No Inhibition | No Inhibition | No Inhibition | No Inhibition | No Inhibition | Inhibition | No Inhibition | Neutral | Inhibition | Inhibition | No Inhibition | No Inhibition | Inhibition = 1/7  No Inhibition = 6/7 | Inhibition = 2/7  No Inhibition = 5/7 |
| R716H | Inhibition | Neutral | No Inhibition | Inhibition | No Inhibition | No Inhibition | No Inhibition | Inhibition | No Inhibition | Neutral | Inhibition | Inhibition | Inhibition | No Inhibition | Inhibition = 3/7  No Inhibition = 4/7 | Inhibition = 3/7  No Inhibition = 4/7 |
| R716C | Inhibition | Inhibition | No Inhibition | Inhibition | No Inhibition | No Inhibition | No Inhibition | Inhibition | No Inhibition | Inhibition | Inhibition | Inhibition | Inhibition | No Inhibition | Inhibition = 3/7  No Inhibition = 4/7 | Inhibition = 5/7  No Inhibition = 2/7 |
| N720S | Inhibition | Inhibition | No Inhibition | Inhibition | Inhibition | Inhibition | No Inhibition | Inhibition | Inhibition | Neutral | Inhibition | Inhibition | Inhibition | No Inhibition | Inhibition = 5/7  No Inhibition = 2/7 | Inhibition = 5/7  No Inhibition =2/7 |
| P737H | No Inhibition | Inhibition | No Inhibition | Inhibition | No Inhibition | No Inhibition | No Inhibition | Inhibition | Inhibition | Inhibition | No Inhibition | No Inhibition | No Inhibition | Inhibition | Inhibition = 1/7  No Inhibition = 6/7 | Inhibition = 5/7  No Inhibition = 2/7 |
| P737L | No Inhibition | Inhibition | Inhibition | No Inhibition | No Inhibition | No Inhibition | No Inhibition | Inhibition | Inhibition | Neutral | Inhibition | Inhibition | No Inhibition | No Inhibition | Inhibition = 3/7  No Inhibition = 4/7 | Inhibition = 3/7  No Inhibition = 4/7 |
| V748F | Inhibition | Inhibition | No Inhibition | No Inhibition | Inhibition | Inhibition | No Inhibition | Inhibition | Inhibition | No Inhibition | No Inhibition | Inhibition | No Inhibition | Inhibition | Inhibition = 3/7  No Inhibition = 4/7 | Inhibition = 5/7  No Inhibition = 2/7 |
| L760M | Inhibition | No Inhibition | Inhibition | No Inhibition | No Inhibition | No Inhibition | No Inhibition | Inhibition | Inhibition | Neutral | Inhibition | No Inhibition | No Inhibition | No Inhibition | Inhibition = 4/7  No Inhibition = 3/7 | Inhibition = 1/7  No Inhibition = 6/7 |
| I761T | Inhibition | Inhibition | No Inhibition | Inhibition | Inhibition | No Inhibition | No Inhibition | Inhibition | No Inhibition | Inhibition | Inhibition | Inhibition | Inhibition | Inhibition | Inhibition = 4/7  No Inhibition = 3/7 | Inhibition = 6/7  No Inhibition = 1/7 |
| F762L | Inhibition | Inhibition | No Inhibition | Inhibition | No Inhibition | No Inhibition | No Inhibition | Inhibition | No Inhibition | No Inhibition | Inhibition | Inhibition | Inhibition | No Inhibition | Inhibition = 3/7  No Inhibition = 4/7 | Inhibition = 4/7  No Inhibition = 3/7 |
| G764R | No Inhibition | Inhibition | No Inhibition | No Inhibition | No Inhibition | No Inhibition | No Inhibition | Inhibition | Inhibition | No Inhibition | Inhibition | No Inhibition | No Inhibition | Inhibition | Inhibition = 2/7  No Inhibition = 5/7 | Inhibition = 3/7  No Inhibition = 4/7 |
| R766K | No Inhibition | Inhibition | No Inhibition | Inhibition | No Inhibition | No Inhibition | No Inhibition | Inhibition | No Inhibition | Inhibition | Inhibition | Inhibition | Inhibition | No Inhibition | Inhibition = 2/7  No Inhibition = 5/7 | Inhibition = 5/7  No Inhibition = 2/7 |
| R768L | Inhibition | No Inhibition | No Inhibition | No Inhibition | Inhibition | No Inhibition | No Inhibition | Inhibition | No Inhibition | No Inhibition | Inhibition | Inhibition | Inhibition | No Inhibition | Inhibition = 4/7  No Inhibition = 3/7 | Inhibition = 2/7  No Inhibition = 5/7 |
| R768W | No Inhibition | No Inhibition | No Inhibition | Inhibition | No Inhibition | No Inhibition | No Inhibition | Inhibition | Inhibition | No Inhibition | No Inhibition | Inhibition | No Inhibition | Inhibition | Inhibition = 1/7  No Inhibition = 6/7 | Inhibition = 4/7  No Inhibition = 3/7 |
| R775I | Neutral | Neutral | Inhibition | Inhibition | Neutral | Neutral | Neutral | Neutral | Neutral | Neutral | Neutral | Neutral | Neutral | Neutral | Inhibition = 1/7  No Inhibition = 6/7 | Inhibition = 1/7  No Inhibition = 6/7 |
| P780S | Neutral | Neutral | Inhibition | Inhibition | Neutral | Neutral | Neutral | Neutral | Neutral | Neutral | No Inhibition | Neutral | Neutral | Neutral | Inhibition = 1/7  No Inhibition = 6/7 | Inhibition = 1/7  No Inhibition = 6/7 |
| D785N | Neutral | Neutral | Inhibition | Inhibition | Neutral | Neutral | Neutral | Neutral | Neutral | Neutral | Neutral | Neutral | Neutral | Neutral | Inhibition = 1/7  No Inhibition = 6/7 | Inhibition = 1/7  No Inhibition = 6/7 |
| G789R | Neutral | Neutral | Inhibition | Inhibition | Neutral | Neutral | Neutral | Neutral | Neutral | Neutral | Neutral | Neutral | Neutral | Neutral | Inhibition = 1/7  No Inhibition = 6/7 | Inhibition = 1/7  No Inhibition = 6/7 |
| T798P | Neutral | Neutral | Neutral | Inhibition | Neutral | Neutral | Neutral | Neutral | Neutral | Neutral | Neutral | Neutral | Neutral | Neutral | Inhibition = 0/7  No Inhibition = 7/7 | Inhibition = 1/7  No Inhibition = 6/7 |
| T803I | Neutral | Neutral | Inhibition | Inhibition | Neutral | Neutral | Neutral | Neutral | Neutral | Neutral | Neutral | Neutral | Neutral | Neutral | Inhibition = 1/7  No Inhibition = 6/7 | Inhibition = 1/7  No Inhibition = 6/7 |
| S47C, P284S | Inhibition | Inhibition | No Inhibition | No Inhibition | No Inhibition | No Inhibition | No Inhibition | Inhibition | Inhibition | Neutral | Inhibition | Inhibition | Inhibition | No Inhibition | Inhibition = 4/7  No Inhibition = 3/7 | Inhibition = 3/7  No Inhibition = 4/7 |
| E145K, E639K | No Inhibition | Inhibition | Inhibition | Inhibition | Inhibition | No Inhibition | No Inhibition | Inhibition | Inhibition | Neutral | Inhibition | Inhibition | Inhibition | No Inhibition | Inhibition = 5/7  No Inhibition = 2/7 | Inhibition = 4/7  No Inhibition = 3/7 |
| W302G, F400L | No Inhibition | No Inhibition | No Inhibition | No Inhibition | No Inhibition | Inhibition | No Inhibition | Inhibition | Inhibition | No Inhibition | Inhibition | Inhibition | No Inhibition | Inhibition | Inhibition = 2/7  No Inhibition = 5/7 | Inhibition = 4/7  No Inhibition = 3/7 |
| T593I, P729S | Inhibition | No Inhibition | No Inhibition | Inhibition | Inhibition | Inhibition | No Inhibition | Inhibition | No Inhibition | Neutral | No Inhibition | No Inhibition | Inhibition | Inhibition | Inhibition = 3/7  No Inhibition = 4/7 | Inhibition = 4/7  No Inhibition = 3/7 |
| H195Y, F683L | Inhibition | No Inhibition | No Inhibition | No Inhibition | No Inhibition | No Inhibition | No Inhibition | Inhibition | Inhibition | Neutral | Inhibition | Inhibition | No Inhibition | No Inhibition | Inhibition = 3/7  No Inhibition = 4/7 | Inhibition = 2/7  No Inhibition = 5/7 |
| K131Q, F683L | Inhibition | Neutral | No Inhibition | Inhibition | No Inhibition | Inhibition | No Inhibition | Inhibition | Inhibition | Neutral | Inhibition | Inhibition | No Inhibition | Inhibition | Inhibition = 3/7  No Inhibition = 4/7 | Inhibition = 5/7  No Inhibition = 2/7 |
| L120I, V658L | Inhibition | No Inhibition | No Inhibition | No Inhibition | No Inhibition | Inhibition | No Inhibition | Inhibition | Neutral | No Inhibition | Inhibition | Inhibition | Inhibition | Inhibition | Inhibition = 3/7  No Inhibition = 4/7 | Inhibition = 4/7  No Inhibition = 3/7 |
| S280Y, Q598H | Inhibition | No Inhibition | No Inhibition | No Inhibition | No Inhibition | No Inhibition | No Inhibition | Inhibition | No Inhibition | Neutral | Inhibition | Inhibition | Inhibition | Inhibition | Inhibition = 3/7  No Inhibition = 4/7 | Inhibition = 3/7  No Inhibition = 4/7 |
| D427N, A576T | No Inhibition | Inhibition | No Inhibition | No Inhibition | No Inhibition | Inhibition | No Inhibition | Inhibition | Inhibition | Neutral | Inhibition | Inhibition | No Inhibition | No Inhibition | Inhibition = 2/7  No Inhibition = 5/7 | Inhibition = 4/7  No Inhibition = 3/7 |
| W48L, N437H | Inhibition | Neutral | No Inhibition | Inhibition | No Inhibition | No Inhibition | No Inhibition | Inhibition | Inhibition | No Inhibition | Inhibition | Inhibition | No Inhibition | Inhibition | Inhibition = 3/7  No Inhibition = 4/7 | Inhibition = 4/7  No Inhibition = 3/7 |
| P336S, K26N | Inhibition | No Inhibition | No Inhibition | No Inhibition | No Inhibition | No Inhibition | No Inhibition | Inhibition | No Inhibition | Neutral | Inhibition | No Inhibition | No Inhibition | No Inhibition | Inhibition = 2/7  No Inhibition = 5/7 | Inhibition = 1/7  No Inhibition = 6/7 |
| N578S, Y497C | Inhibition | Neutral | No Inhibition | Inhibition | No Inhibition | No Inhibition | No Inhibition | Inhibition | Inhibition | Neutral | Inhibition | No Inhibition | Inhibition | Inhibition | Inhibition = 4/7  No Inhibition = 3/7 | Inhibition = 3/7  No Inhibition = 4/7 |
| P178S, E182D, D427N | Inhibition | Inhibition | No Inhibition | No Inhibition | No Inhibition | Inhibition | No Inhibition | Inhibition | No Inhibition | Neutral | Inhibition | Inhibition | Inhibition | Inhibition | Inhibition = 3/7  No Inhibition = 4/7 | Inhibition = 5/7  No Inhibition = 2/7 |
| R169I, H195Y, N394H | Inhibition | No Inhibition | No Inhibition | Inhibition | Inhibition | No Inhibition | No Inhibition | Inhibition | No Inhibition | Neutral | Inhibition | Inhibition | No Inhibition | Inhibition | Inhibition = 3/7  No Inhibition = 4/7 | Inhibition = 4/7  No Inhibition = 3/7 |
| N194K, R306I, E479D | No Inhibition | No Inhibition | No Inhibition | No Inhibition | Inhibition | No Inhibition | No Inhibition | Inhibition | No Inhibition | Neutral | Inhibition | Inhibition | Inhibition | No Inhibition | Inhibition = 3/7  No Inhibition = 4/7 | Inhibition = 2/7  No Inhibition = 5/7 |
| S128I, R169I, S602Y | Inhibition | Neutral | No Inhibition | Inhibition | Inhibition | Inhibition | No Inhibition | Inhibition | Inhibition | Neutral | Inhibition | Inhibition | Inhibition | No Inhibition | Inhibition = 5/7  No Inhibition = 2/7 | Inhibition = 4/7  No Inhibition = 3/7 |
| M82T, F314L, K600N | Inhibition | Inhibition | No Inhibition | Inhibition | No Inhibition | No Inhibition | No Inhibition | Inhibition | No Inhibition | Neutral | Inhibition | No Inhibition | Inhibition | Inhibition | Inhibition = 3/7  No Inhibition = 4/7 | Inhibition = 4/7  No Inhibition = 3/7 |
| E375D, K577N, R768W | Inhibition | Neutral | No Inhibition | Inhibition | No Inhibition | No Inhibition | No Inhibition | Inhibition | Neutral | Neutral | Inhibition | Inhibition | Inhibition | No Inhibition | Inhibition = 3/7  No Inhibition = 4/7 | Inhibition = 3/7  No Inhibition = 4/7 |
| Q18K, G268C, W610L | Neutral | Neutral | Inhibition | Inhibition | Neutral | Neutral | Neutral | Neutral | Neutral | Neutral | Neutral | Neutral | Neutral | Neutral | Inhibition = 1/7  No Inhibition = 6/7 | Inhibition = 1/7  No Inhibition = 6/7 |
| A25V, A396T, I679N | Inhibition | No Inhibition | No Inhibition | No Inhibition | No Inhibition | Inhibition | No Inhibition | Inhibition | No Inhibition | Neutral | Inhibition | Inhibition | No Inhibition | No Inhibition | Inhibition = 2/7  No Inhibition = 5/7 | Inhibition = 3/7  No Inhibition = 4/7 |
| R393I, E571G, R768W | No Inhibition | No Inhibition | No Inhibition | Inhibition | No Inhibition | No Inhibition | No Inhibition | Inhibition | No Inhibition | Neutral | Inhibition | Inhibition | No Inhibition | Inhibition | Inhibition = 1/7  No Inhibition = 6/7 | Inhibition = 4/7  No Inhibition = 3/7 |
| **Common BA between SARS-CoV and SARS-CoV-2** | **Inhibition: 28**  **No Inhibition: 30**  **Total common between SARS-CoV& SARS-CoV-2: 58** | | **Inhibition: 18**  **No Inhibition: 76**  **Total common between SARS-CoV& SARS-CoV-2: 94** | | **Inhibition: 12**  **No Inhibition: 77**  **Total common between SARS-CoV& SARS-CoV-2: 89** | | **Inhibition: 00**  **No Inhibition: 06**  **Total common between SARS-CoV& SARS-CoV-2: 06** | | **Inhibition: 9**  **No Inhibition: 10**  **Total common between SARS-CoV& SARS-CoV-2: 19** | | **Inhibition: 113**  **No Inhibition: 02**  **Total common between SARS-CoV& SARS-CoV-2: 115** | | **Inhibition: 55**  **No Inhibition: 25**  **Total common between SARS-CoV& SARS-CoV-2: 80** | |  |  |
| **Inference Score correlated with ClusPro** | Inhibition: 85/85  No inhibition: 70/70 | Inhibition: 56/56  No inhibition: 99/99 | Inhibition: 10/85  No inhibition: 53/70  Tot: 63/155 | Inhibition: 22/56  No inhibition: 52/99  Tot: 74/155 | Inhibition: 26/85  No inhibition: 52/70  Tot: 78/155 | Inhibition: 17/56  No inhibition: 79/99  Tot: 96/155 | Inhibition: 0/85  No inhibition: 70/70**(H)**  Tot: 70/155 | Inhibition: 51/56**(H)**  No inhibition: 12/99  Tot: 63/155 | Inhibition: 36/85  No inhibition: 39/70  Tot: 75/155 | Inhibition: 14/56  No inhibition: 91/99**(H)**  Tot: 105/155 | Inhibition: 80/85**(H)**  No inhibition: 14/70  Tot: 94/155 | Inhibition: 49/56  No inhibition: 27/99  Tot: 76/155 | Inhibition: 63/85  No inhibition: 34/70  Tot: 97/155 | Inhibition: 33/56  No inhibition: 56/99  Tot: 89/155 |  |  |
|  | CoV | CoV-2 | CoV | CoV-2 | CoV | CoV-2 | CoV | CoV-2 | CoV | CoV-2 | CoV | CoV-2 | CoV | CoV-2 |  |  |
|  | **ClusPro** | | **ZDOCK** | | **HDOCK** | | **PATCHDOCK** | | **InterEvDock2** | | **SOAP PP** | | **FRODOCK 2** | |  |  |

**Supplementary Table 5.**

| **Mutants** | **ZDOCK** | | **ClusPro** | | **HDOCK** | | **PatchDock** | | **InterEvDock2** | | **SOAP PP** | | **FRODOCK2** | | **INFERENCE** | |
| --- | --- | --- | --- | --- | --- | --- | --- | --- | --- | --- | --- | --- | --- | --- | --- | --- |
| **SARS-CoV** | **SARS-CoV-2** | **SARS-CoV** | **SARS-CoV-2** | **SARS-CoV** | **SARS-CoV-2** | **SARS-CoV** | **SARS-CoV-2** | **SARS-CoV** | **SARS-CoV-2** | **SARS-CoV** | **SARS-CoV-2** | **SARS-CoV** | **SARS-CoV-2** | **SARS-CoV** | **SARS-CoV-2** |
| WILD TYPE | **Binds with SARS-CoV** | **Binds with SARS-CoV-2** | **Binds with SARS-CoV** | **Binds with SARS-CoV-2** | **Binds with SARS-CoV** | **Binds with SARS-CoV-2** | **Binds with SARS-CoV** | **Binds with SARS-CoV-2** | **Binds with SARS-CoV** | **Binds with SARS-CoV-2** | **Binds with SARS-CoV** | **Binds with SARS-CoV-2** | **Binds with SARS-CoV** | **Binds with SARS-CoV-2** |  |  |
| S5F | No inhibition | No inhibition | Neutral | Neutral | Neutral | Neutral | Neutral | Neutral | Neutral | Neutral | Neutral | Neutral | Neutral | Neutral | Inhibition= 0/7  No inhibition= 7/7 | Inhibition= 0/7  No inhibition= 7/7 |
| A25V | No inhibition | No inhibition | Inhibition | No inhibition | No inhibition | Inhibition | No inhibition | Inhibition | No inhibition | Neutral | Inhibition | Inhibition | No inhibition | No inhibition | Inhibition= 2/7  No inhibition= 5/7 | Inhibition= 3/7  No inhibition= 4/7 |
| L100V | No inhibition | Inhibition | Inhibition | Inhibition | No inhibition | No inhibition | No inhibition | Inhibition | No inhibition | Neutral | Inhibition | Inhibition | Inhibition | Inhibition | Inhibition= 3/7  No inhibition= 4/7 | Inhibition= 5/7  No inhibition= 2/7 |
| V184A | No inhibition | Inhibition | Inhibition | Neutral | No inhibition | No inhibition | No inhibition | Inhibition | No inhibition | Neutral | Inhibition | No inhibition | Inhibition | Inhibition | Inhibition= 3/7  No inhibition= 4/7 | Inhibition= 3/7  No inhibition= 4/7 |
| S218N | Inhibition | No inhibition | Inhibition | Inhibition | No inhibition | No inhibition | No inhibition | No inhibition | No inhibition | Neutral | Inhibition | Inhibition | No inhibition | No inhibition | Inhibition= 3/7  No inhibition= 4/7 | Inhibition= 2/7  No inhibition= 5/7 |
| Y252C | No inhibition | Inhibition | Inhibition | Inhibition | No inhibition | No inhibition | No inhibition | Inhibition | No inhibition | Neutral | Inhibition | Inhibition | No inhibition | No inhibition | Inhibition= 2/7  No inhibition= 5/7 | Inhibition= 4/7  No inhibition= 3/7 |
| P253T | No inhibition | No inhibition | Inhibition | No inhibition | No inhibition | No inhibition | No inhibition | Inhibition | No inhibition | No inhibition | Inhibition | Inhibition | Inhibition | No inhibition | Inhibition= 3/7  No inhibition= 4/7 | Inhibition= 2/7  No inhibition= 5/7 |
| T276K | No inhibition | No inhibition | Inhibition | Inhibition | No inhibition | No inhibition | No inhibition | Inhibition | No inhibition | Neutral | Inhibition | Inhibition | Inhibition | No inhibition | Inhibition= 3/7  No inhibition= 4/7 | Inhibition= 3/7  No inhibition= 4/7 |
| N322I | No inhibition | Inhibition | Inhibition | Inhibition | No inhibition | No inhibition | No inhibition | Inhibition | Inhibition | Neutral | Inhibition | Inhibition | Inhibition | No inhibition | Inhibition= 4/7  No inhibition= 3/7 | Inhibition= 4/7  No inhibition= 3/7 |
| T334A | No inhibition | Inhibition | Inhibition | Neutral | No inhibition | No inhibition | Inhibition | Inhibition | No inhibition | Neutral | Inhibition | Inhibition | No inhibition | Inhibition | Inhibition= 3/7  No inhibition= 4/7 | Inhibition= 4/7  No inhibition= 3/7 |
| A413V | No inhibition | No inhibition | Inhibition | Inhibition | Inhibition | No inhibition | No inhibition | Inhibition | No inhibition | Neutral | Inhibition | Inhibition | Inhibition | No inhibition | Inhibition= 4/7  No inhibition= 3/7 | Inhibition= 3/7  No inhibition= 4/7 |
| K416N | No inhibition | No inhibition | Inhibition | No inhibition | No inhibition | No inhibition | No inhibition | Inhibition | Inhibition | Neutral | Inhibition | Inhibition | Inhibition | No inhibition | Inhibition= 4/7  No inhibition= 3/7 | Inhibition= 2/7  No inhibition= 5/7 |
| P426L | No inhibition | No inhibition | Inhibition | Inhibition | No inhibition | Inhibition | No inhibition | Inhibition | No inhibition | Neutral | Inhibition | Inhibition | Inhibition | Inhibition | Inhibition= 3/7  No inhibition= 4/7 | Inhibition= 5/7  No inhibition= 2/7 |
| E457K | No inhibition | No inhibition | No inhibition | No inhibition | No inhibition | Inhibition | No inhibition | Inhibition | No inhibition | Neutral | Inhibition | No inhibition | No inhibition | No inhibition | Inhibition= 1/7  No inhibition= 6/7 | Inhibition= 2/7  No inhibition= 5/7 |
| Q472P | No inhibition | No inhibition | Inhibition | No inhibition | No inhibition | No inhibition | No inhibition | Inhibition | No inhibition | Neutral | Inhibition | Inhibition | Inhibition | Inhibition | Inhibition= 3/7  No inhibition= 4/7 | Inhibition= 3/7  No inhibition= 4/7 |
| P612L | No inhibition | No inhibition | Inhibition | No inhibition | No inhibition | No inhibition | No inhibition | Inhibition | No inhibition | Neutral | Inhibition | Inhibition | Inhibition | Inhibition | Inhibition= 2/7  No inhibition= 5/7 | Inhibition= 2/7  No inhibition= 5/7 |
| W635L | No inhibition | No inhibition | Inhibition | Inhibition | No inhibition | No inhibition | No inhibition | Inhibition | No inhibition | Inhibition | Inhibition | Inhibition | Inhibition | Inhibition | Inhibition= 3/7  No inhibition= 4/7 | Inhibition= 4/7  No inhibition= 3/7 |
| Y649C | No inhibition | Inhibition | Inhibition | Neutral | No inhibition | No inhibition | No inhibition | Inhibition | No inhibition | Inhibition | Inhibition | Inhibition | Inhibition | Inhibition | Inhibition= 2/7  No inhibition= 5/7 | Inhibition= 5/7  No inhibition= 1/7 |
| E668K | Inhibition | Inhibition | No inhibition | No inhibition | No inhibition | Inhibition | No inhibition | Inhibition | Inhibition | Neutral | Inhibition | No inhibition | Inhibition | Inhibition | Inhibition= 4/7  No inhibition= 3/7 | Inhibition= 4/7  No inhibition= 3/7 |
| A782V | No inhibition | Inhibition | Neutral | Neutral | Neutral | Neutral | Neutral | Neutral | Neutral | Neutral | Neutral | Neutral | Neutral | Neutral | Inhibition= 0/7  No inhibition= 1/7 | Inhibition=1/7  No inhibition= 6/7 |
| A386T, F314I | No inhibition | Inhibition | Inhibition | Inhibition | No inhibition | No inhibition | No inhibition | Inhibition | No inhibition | Neutral | Inhibition | Inhibition | Inhibition | Inhibition | Inhibition= 3/7  No inhibition= 4/7 | Inhibition= 5/7  No inhibition= 2/7 |
| F603C, K619N | Inhibition | No inhibition | Inhibition | Inhibition | No inhibition | No inhibition | No inhibition | No inhibition | No inhibition | Inhibition | Inhibition | Inhibition | Inhibition | Inhibition | Inhibition= 4/7  No inhibition= 3/7 | Inhibition= 4/7  No inhibition= 3/7 |
| F314L, Y510H | No inhibition | Inhibition | Neutral | No inhibition | No inhibition | No inhibition | No inhibition | Inhibition | No inhibition | Neutral | Inhibition | Inhibition | Inhibition | No inhibition | Inhibition= 2/7  No inhibition= 5/7 | Inhibition= 3/7  No inhibition= 4/7 |
| L664I, D382Y | No inhibition | Inhibition | Inhibition | Neutral | No inhibition | No inhibition | No inhibition | Inhibition | No inhibition | No inhibition | Inhibition | No inhibition | Inhibition | Inhibition | Inhibition= 3/7  No inhibition= 4/7 | Inhibition= 3/7  No inhibition= 4/7 |
| E145K, E495K, I233S | Inhibition | Inhibition | No inhibition | Inhibition | Inhibition | No inhibition | No inhibition | Inhibition | Inhibition | Neutral | Inhibition | Inhibition | Inhibition | No inhibition | Inhibition= 5/7  No inhibition= 2/7 | Inhibition= 4/7  No inhibition= 3/7 |
| **Common BA between SARS-CoV and SARS-CoV-2** | Inhibition: 02  No Inhibition: 11  Total common between SARS-CoV& SARS-CoV-2: 13 | | Inhibition: 10  No Inhibition: 05  Total common between SARS-CoV& SARS-CoV-2: 12 | | Inhibition: 0  No Inhibition: 19  Total common between SARS-CoV& SARS-CoV-2: 17 | | Inhibition: 01  No Inhibition: 04  Total common between SARS-CoV& SARS-CoV-2: 03 | | Inhibition: 0  No Inhibition: 18  Total common between SARS-CoV& SARS-CoV-2: 02 | | Inhibition: 18  No Inhibition: 02  Total common between SARS-CoV& SARS-CoV-2: 18 | | Inhibition: 08  No Inhibition: 06  Total common between SARS-CoV& SARS-CoV-2: 12 | |  | |
| **Inference Score correlated with ClusPro** | Inhibition: 4/25  No Inhibition: 21/25 | Inhibition: 12/25  No Inhibition: 13/25 | Inhibition: 19/25  No Inhibition: 6/25 | Inhibition: 11/25  No Inhibition: 14/25 | Inhibition: 2/25  No Inhibition: 23/25 | Inhibition: 4/25  No Inhibition: 21/25 | Inhibition: 1/25  No Inhibition: 24/25 | Inhibition: 21/25  No Inhibition: 4/25 | Inhibition: 4/25  No Inhibition: 21/25 | Inhibition: 3/25  No Inhibition: 22/25 | Inhibition: 23/25  No Inhibition: 2/25 | Inhibition: 19/25  No Inhibition: 7/25 | Inhibition: 16/25  No Inhibition: 9/25 | Inhibition: 11/25  No Inhibition: 14/25 |  | |
|  | CoV | CoV-2 | CoV | CoV-2 | CoV | CoV-2 | CoV | CoV-2 | CoV | CoV-2 | CoV | CoV-2 | CoV | CoV-2 |  | |
|  | **ZDOCK** | | **ClusPro** | | **HDOCK** | | **PATCHDOCK** | | **InterEvDock2** | | **SOAP PP** | | **FRODOCK 2** | |  | |
